# Programmed genome editing of the omega-1 ribonuclease of the blood fluke, *Schistosoma mansoni*

Wannaporn Ittiprasert<sup>1</sup>, Victoria H. Mann<sup>1</sup>, Shannon E. Karinshak<sup>1</sup>, Avril Coghlan<sup>2</sup>, Gabriel Rinaldi<sup>2</sup>, Geetha Sankaranarayanan<sup>2</sup>, Apisit Chaidee<sup>1,3</sup>, Toshihiko Tanno<sup>4</sup>, Chutima Kumkhaek<sup>5</sup>, Pannathee Prangtaworn<sup>1,6</sup>, Margaret Mentink-Kane<sup>7</sup>, Christina J. Cochran<sup>1</sup>, Patrick Driguez<sup>2</sup>, Nancy Holroyd<sup>2</sup>, Alan Tracey<sup>2</sup>, Rutchanee Rodpai<sup>1,3</sup>, Bart Everts<sup>8</sup>, Cornelis H. Hokke<sup>8</sup>, Karl F. Hoffmann<sup>9</sup>, Matthew Berriman<sup>2</sup>, Paul J. Brindley<sup>1</sup>

1. Department of Microbiology, Immunology & Tropical Medicine, & Research Center for Neglected Diseases of Poverty, School of Medicine & Health Sciences, George Washington University, Washington, D.C. 20037, USA

2. Wellcome Sanger Institute, Wellcome Genome Campus, Hinxton, CB10 1SA, UK

3. Department of Parasitology, Faculty of Medicine, Khon Kaen University, Khon Kaen, 40002, Thailand

4. Department of Surgery and the Institute of Human Virology, University of Maryland, Baltimore, MD 21201, USA

5. Cellular and Molecular Therapeutics Laboratory, National Heart, Lungs and Blood Institute, National Institutes of Health, Bethesda, MD 20814 USA

6. Department of Parasitology, Faculty of Medicine Siriraj Hospital, Mahidol University, Bangkok, Thailand 10700

7. Schistosomiasis Resource Center, Biomedical Research Institute, Rockville, MD 20850, USA

8. Department of Parasitology, Leiden University Medical Center, Leiden, Netherlands

9. Institute of Biological, Environmental & Rural Sciences (IBERS), Aberystwyth University, Aberystwyth, SY23 3DA, UK

## Running title Genome editing of schistosome omega-1

**Keywords:** *Schistosoma mansoni*; genome editing; CRISPR/Cas9; omega1; ribonuclease; flatworms; Platyhelminthes; functional genomics; lentivirus; homology directed repair; non-homologous end joining; double stranded break; Th2 phenotype; monocytic macrophage cell; granuloma; schistosomiasis

\*Correspondence, Paul Brindley, [pbrindley@gwu.edu](mailto:pbrindley@gwu.edu)

# Abstract

CRISPR/Cas9 based genome editing has not yet been reported in schistosomes. Here, we tested this approach by targeting omega-1 ( $\omega$ 1) of *Schistosoma mansoni* as a proof of principle. This secreted ribonuclease is crucial for Th2 priming and granuloma formation, providing informative immuno-pathological readouts for programmed genome editing. Schistosome eggs were either exposed to recombinant Cas9 complexed with a synthetic guide RNA (sgRNA) complementary to exon 6 of  $\omega$ 1 by electroporation or transduced with pseudotyped lentivirus encoding Cas9 and the sgRNA. Some eggs were also transduced with a single stranded oligodeoxynucleotide donor transgene that encoded six stop codons, flanked by 50 nt-long 5'- and 3'-microhomology arms matching the predicted Cas9-catalyzed double stranded break (DSB) within  $\omega$ 1. CRISPResso analysis of amplicons spanning the DSB revealed ~4.5% of the reads were mutated by insertions, deletions and/or substitutions, with an efficiency for homology directed repair of 0.19% insertion of the donor transgene. Transcripts encoding  $\omega$ 1 were reduced >80%, and lysates of  $\omega$ 1-edited eggs displayed diminished ribonuclease activity indicative that programmed editing mutated the  $\omega$ 1 gene. Whereas soluble lysates of wild type eggs polarized Th2 cytokine responses including IL-4 and IL-5 in human macrophage/T cell co-cultures, diminished levels of these cytokines followed the exposure to those of  $\omega$ 1-mutated schistosome eggs. Following injection of schistosome eggs into the tail vein of BALB/c mice, the volume of pulmonary granulomas surrounding  $\omega$ 1-mutated eggs was 18-fold smaller than wild type eggs. Programmed genome editing was active in schistosomes, Cas9-catalyzed chromosomal breakage was repaired by homology directed repair and/or non-homologous end joining, and mutation of  $\omega$ 1 impeded the capacity of schistosome eggs both to drive Th2 polarization and to provoke formation of pulmonary circumoval granulomas. Knock-out of  $\omega$ 1 and the impaired immunological phenotype showcase the novel application of programmed gene editing in and functional genomics for schistosomes.

# Introduction

Schistosomiasis is considered the most problematic of the human helminth diseases in terms of morbidity and mortality [1-4]. The past decade has seen major advances in knowledge and understanding of the pathophysiology, developmental biology, evolutionary relationships and genome annotation of the human schistosomes [5-16]. Establishing CRISPR/Cas9 genome editing in schistosomiasis would greatly enable effective functional genomics approaches. The stable CRISPR/Cas9-based site-specific gene mutation and phenotyping will drive innovation and a deeper understanding of schistosome pathogenesis, biology and evolution [17].

The schistosome egg plays a central role both in disease transmission and pathogenesis [1]. The appearance of *S. mansoni* eggs in host tissues by six to seven weeks after infection coincides with profound polarization to a granulomatous, type 2 T helper cell (Th2) phenotype [18-22]. Numerous egg proteins have been characterized, with >1,000 identified in a well-studied fraction termed soluble egg antigen (SEA) [23-26]. In viable eggs, about 30 of the SEA proteins are located outside the developing miracidium and encompass the complement of secreted antigens (egg-secreted proteins, ESP) that interact with host tissues to facilitate the passage of the egg from the mesenteric veins to the intestinal lumen [27]. The T2 ribonuclease omega-1 ( $\omega$ 1) is the principal Th2-inducing component of ESP with its Th2-polarizing activity dependent upon both its RNase activity and glycosylation [19, 20, 28]. This RNase is hepatotoxic [29], and its secretion by eggs into the granuloma regulates the pattern recognition receptor signaling pathways in dendritic cells that, in turn, prime Th2 responses from CD4<sup>+</sup> T cells [30]. Secreted  $\omega$ 1 provokes granulomatous inflammation around eggs traversing the wall of the intestines, and trapped in hepatic sinusoids and other host organs, driving fibrosis that eventually results in hepatointestinal schistosomiasis [1, 31]. As  $\omega$ 1 drives distinctive immunological phenotypes including Th2 polarization and granuloma formation, we investigated, for the first time in schistosomes and indeed any flatworms, the use of programmed CRISPR/Cas9-mediated genome editing [32, 33] to alter the  $\omega$ 1 locus by both gene knockout and knock-in approaches. The investigation revealed that programmable genome editing catalyzed by the bacterial endonuclease Cas9 was active in schistosomes, with chromosomal double stranded breaks (DSB) repaired by homology recombination directed repair (HDR) using a donor, single stranded oligonucleotide template bearing short homology arms and/or by non-homologous end joining (NHEJ). The programmed mutagenesis decreased levels of  $\omega$ 1 mRNA and induced distinct *in vitro* and *in vivo* phenotypes, including a substantial loss of capacity of SEA from  $\omega$ 1-mutated eggs to polarize Th2 cytokine responses (IL-4 and IL-5) in co-cultured monocytic and T cells and loss of capacity to provoke formation of pulmonary granulomas *in vivo*. Functional knock-out of  $\omega$ 1 and the resulting immunologically impaired phenotype showcase the novel application of CRISPR/Cas9 and its utility for functional genomics in schistosomes.

# Results

## *Omega-1*, a multicopy locus on chromosome 1 of *S. mansoni* specifically expressed in eggs

The  $\omega 1$  locus on chromosome 1 is repetitive and presents a challenge for genome assembly. Five genomic copies of  $\omega 1$  were identified in the *S. mansoni* reference genome, versions 5 (Fig. S1). A single copy of  $\omega 1$  selected for genome editing includes nine exons separated by eight introns and spans 6,195 nt (Smp\_193860) (Fig. 1A). Several other copies have similar exon/intron structure, (Fig. S1) and conserved, predicted amino acid sequences. The predicted coding sequence (CDS) of Smp\_193860 encodes an enzyme of ~31 kDa, as reported for  $\omega 1$  [34] and encodes a T2 ribonuclease with conserved CASI and CASII catalytic regions. We designed a sgRNA targeting residues 3808 to 3827 of the predicted exon 6 of Smp\_193860, adjacent to the protospacer adjacent motif (PAM) AGG and with the predicted Cas9 cleavage site located at three residues upstream of this PAM. The AGG and the nucleotide sequence complementary to this sgRNA were present on two additional copies of  $\omega 1$ , Smp\_179960 and Smp\_184360. These shared >99% identity to Smp\_193860 although the CDS of the three gene copies of  $\omega 1$  differed by several substitutions (Fig. S2, panels A, B). Notably, the  $\omega 1$  copies Smp\_193860, Smp\_179960 and Smp\_184360 displayed an egg stage-specific expression profile without expression elsewhere throughout the developmental cycle of this schistosome (Fig. S1C) [35].

## Homologous Recombination Directed Repair and Non-Homologous End Joining pathways in schistosomes

### HDR and NHEJ pathways in schistosomes

The draft genome of *Schistosoma mansoni* genome was surveyed for key proteins of the non-homologous end joining (NHEJ) and homologous recombination directed repair (HDR) pathways. Artemis and DNA-PKcs are essential NHEJ factors in vertebrates [36, 37]. Candidate homologues for six of seven human NHEJ pathway genes and for two key HDR pathway genes, were identified by searching for matches to Pfam (Table S1). A putative homologue of Cernunnos/XLF was not apparent in *S. mansoni* [37] based on searching for the Pfam XLF domain (PF09302) found in human Cernunnos/XLF. The domain appears to be absent from all flatworm species studied by the International Helminth Genomes Consortium [38].

### Site-specific integration of exogenous DNA confirmed CRISPR-Cas9 activity in schistosomes

The activity and efficiency of CRISPR/Cas9 to edit the schistosome genome, by targeting the  $\omega 1$  locus, was explored using two approaches. First, a ribonucleoprotein complex (RNP) comprised of sgRNA mixed with recombinant Cas9 endonuclease was delivered into schistosome eggs isolated from livers of experimentally-infected mice (eggs termed 'LE', 'liver eggs') by electroporation. In addition, Homology Directed Repair (HDR) of CRISPR/Cas9-induced DSBs at the  $\omega 1$  locus in the presence of a donor DNA template was investigated [39-41]. A single stranded oligodeoxynucleotide (ssODN) of 124 nt in length was delivered to some LE as a template for HDR of chromosomal double stranded breaks (DSBs) (Fig. 1B). The ssODN included a short transgene encoding six stop codons flanked by 5'- and 3'-homology arms, each



arm 50 nt in length, complementary to the genome sequence of exon 6 on the 5' and 3' sides of the Cas9 cleavage site (Fig. 1A, B). In a second approach, a lentivirus vector (pLV- $\omega$ 1X1; Fig. 1C) that included Cas9, driven by the mammalian translational elongation factor 1 promoter, and the exon 6-targeting sgRNA (20 nt), driven by the human U6 promoter was engineered [42]. LE were transduced with pseudotyped lentiviral virions (LV) by exposed in culture to LV for 24 hours [43] and, thereafter, transfected with the ssODN repair template. In both approaches, expression of  $\omega$ 1 in LE after 72 hours in culture was ascertained.

Given that the donor ssODN included a short transgene that facilitates genotyping, PCR was performed using template genomic DNAs from the CRISPR/Cas9-treated LE [39] to reveal the site-specific knock-in (KI). A forward primer termed Sm $\omega$ 1X1-6stp-cds-F specific for the ssODN transgene was paired with three discrete reverse primers, termed Sm $\omega$ 1-R1, Sm $\omega$ 1-R2 and Sm $\omega$ 1-R3, at increasing distance from the predicted HDR insertion site in  $\omega$ 1 (Table S2). Amplicons of the expected sizes of 184, 285 and 321nt were observed in genome-edited eggs but not in control eggs (Fig. 2A, B; Fig. S3A), a diagnostic pattern indicative of the ssODN transgene insertion into  $\omega$ 1 and, in turn, indicating that the resolution of the DSB at the  $\omega$ 1 locus from CRISPR/Cas9 had been mediated by HDR. Amplification using a control primer pair that spanned the predicted DSB, termed Sm $\omega$ 1-control-F/R, yielded control amplicons of the expected 991 nt. Similar findings were observed with genome editing delivered by RNPs and by LV (Fig. S3). Sanger sequence analysis of the knocked-in amplicons (KI-R1, KI-R2 and KI-R3) confirmed the presence of the transgene inserted into the  $\omega$ 1 locus at the site predicted for programmed Cas9 cleavage (Fig. 2C).

# **Programmed mutations detected in exon 6 of $\omega$ 1**

The activity of CRISPR/Cas9 was first evaluated by a quantitative PCR (qPCR) approach that relies on the inefficient binding of a primer overlapping the gRNA target, i.e. where mutations are expected to have occurred, compared to the binding efficiency of flanking primers, i.e. outside the mutated region [44, 45]. The overlapping (OVR) primer pair shared the reverse primer with OUT primer (Fig. S4 A). Genomic DNA template was used for qPCR to quantify the efficiency of CRISPR-mediated mutagenesis at the target locus; the ratio between the OVR products and OUT products estimates the relative amplification fold reduction in CRISPR/Cas9-manipulated samples compared to controls in the target sequence of the gRNA, i.e. the annealing site for the OVR primer. Relative fold amplification was reduced by 12.5% was detected in gDNA isolated from eggs treated with pLV- $\omega$ 1X1 and ssODN whereas a reduction in relative fold amplification of 2.5, 6.9, and 4.5 were observed in eggs treated with gRNA/Cas9 RNP complex alone, gRNA/Cas9 RNP complex and ssODN, or pLV- $\omega$ 1X1 alone, respectively. A reduction in relative fold amplification was not apparent among control groups, i.e. untreated eggs, eggs electroporated in the presence of Opti-MEM only, eggs transduced with heated-inactivated pLV- $\omega$ 1X1 with or without ssODN donor, and eggs transfected with ssODN only (Fig. S4B).

To further characterize and quantify the mutations that arose in the genome of  $\omega$ 1 gene-edited eggs, we used an amplicon-sequencing approach. Barcoded amplicon libraries were constructed from pooled genomic DNA of six independent exposures of LE to pLV- $\omega$ 1X1 and the donor ssODN. Each amplicon was sequenced on the MiSeq Illumina platform and the CRISPResso pipeline [46] was used to analyze deep-coverage sequence. More than 56 million sequenced

reads were compared to the reference sequence of the Smp\_193860 locus (Table S3), which revealed that 71% exhibited the wild type (WT, i.e. unmodified DNA) whereas 29 % reads exhibited apparent mutations (Fig. 2D) across the 202 bp amplicon, with 0.13% insertions, 0.58% deletions and 28.2% substitutions (Table S3, sample 9). In contrast, in the control eggs-only group, 76% were WT, and 24% of reads exhibited apparent mutations, with 0.14% insertions, 0.33% deletions, and 24.0% substitutions (Fig. 2E; Table S3, sample 2 in Table S3). Thus, subtracting the rate of apparent mutations in the control, we estimated that 0.25% and 4.2% of reads in the experimental sample carried programmed CRISPR-induced deletions and substitutions, respectively. Indels of 1-2 bp, or multiples thereof, in coding DNA cause frame-shifts, and consistent with its higher rate of indels, the CRISPR/Cas9-treated sample displayed a higher rate of frame-shifts compared to a sample from control eggs (2.0% versus 1.4%; Table S3).

Many apparent sequence variants common to the control and edited eggs likely reflect polymorphism among copies of  $\omega 1$  rather than programmed mutations. The sequence reads revealed several common variants, such as adjacent 'TA' substitutions instead of 'CC' at positions 152-153 of the amplicon, which encodes a change from Q to K at the amino acid level. The gene Smp\_193860 has 'TA' at this position in the V5 assembly [12], as does the mRNA XP\_018647487.1 from the NCBI database, whereas Smp\_193860, Smp\_184360 and Smp\_179960 all have 'CC' at this position in the V7 assembly (Berriman and co-workers, in preparation) (Fig. S2 panels A, B), whereas 'CC' was also observed in KI fragments by Sanger direct sequencing (Fig. 2C). Similarly, a second common dinucleotide substitution from 'AC' to 'TT' at positions 60-61 encodes an amino acid change from T to F. Both dinucleotide substitutions occurred together in 8% of reads in the control group (Table S3, sample 2,) and 4% of reads in the gene-edited sample (Table S3, sample 9). Both these non-synonymous substitutions may have functional significance given their proximity to the catalytic site of the ribonuclease (Fig. S2, panels C, D).

Along with the predicted NHEJ-catalyzed mutations, CRISPResso determined the rate of HDR-mediated ssODN knock-in (Table S3; Fig. 2F). Here, insertion of the 24 bp transgene was confirmed in 0.19% of the reads at the sgRNA programmed CRISPR/Cas9 target site (Fig. 2F; sample 9 in Table S3). Some reads containing the knock-in sequence included the 'CC' to 'TA' substitutions at positions 152-153 and 'AC' to 'TT' at positions 60-61 (Fig. S2; Table S3). This indicates that the indels catalyzed by NHEJ and/or KI by HDR occurred in multiple copies of  $\omega 1$  including Smp\_193860, Smp\_184360 and Smp\_179960, and possibly also further copies not yet annotated in the reference genome. The qPCR approach estimated a reduction by 12.5% in relative fold amplification in the pLV- $\omega 1$ X1 with ssODN treatment group (Fig. S4) whereas CRISPResso analysis of the pooled NGS reads indicated a frequency of indel/substitution mutation of ~4.5% (Table S3).

### **Programmed gene editing markedly reduced the expression of $\omega 1$**

Liver eggs (LE) transfected with RNP complexes, without or with ssODN, displayed a down regulation of the  $\omega 1$ -specific transcript of ~45% and 81%, respectively, compared to controls ( $p \leq 0.05$ ;  $n = 11$ ). However, LE transduced with pLV- $\omega 1$ X1 virions, without or with ssODN, showed a reduction of the  $\omega 1$ -specific transcripts of 67% and 83% respectively, when compared to controls (Fig. 3A). Similar outcomes were seen in all biological replicates undertaken ( $n = 11$ ).

This outcome indicated that resolution of chromosomal DSB by NHEJ plus HDR provided enhanced programmed gene knockout compared to NHEJ-mediated chromosomal repair alone. Nevertheless, both RNPs and pLV virions efficiently delivered programmed gene editing to schistosomes but lentiviral transduction delivered enhanced performance with stronger gene silencing, in particular when the donor repair template was provided (Fig. 3A). When examined at later time points (days 5 and 7 following manipulation of the LE), further reduction in  $\omega 1$  abundance was not apparent (Fig. 3B).

Large DNA deletions have been associated with CRISPR/Cas9 mutations in another helminth species [40]. However, using qPCR to estimate relative copy number, as previously described [47], we found no evidence that silencing of  $\omega 1$  was associated with a reduction in the copy number of this multi-gene locus (Fig. S5).

### **Diminished ribonuclease activity in CRISPR/Cas9 mutated Soluble Egg Antigen**

The ribonuclease activity of the  $\omega 1$  glycoprotein in SEA is associated with the Th2-polarized immune response that underpins the appearance of schistosome egg granulomata [19, 22]. Ribonuclease activity of SEA from control and experimental groups on substrate yeast RNA was investigated following CRISPR/Cas9 programmed mutation of  $\omega 1$  mediated by the RNP and the pseudotyped lentiviral approaches with or without ssODN [20, 48]. Intact yeast RNA was evident in the DNase-RNase free condition (negative control), indicative of absence of RNase activity in the reagents (200 ng yeast RNA at the outset). There was near complete hydrolysis of yeast RNA following exposure to RNase A (positive control); ~1.4 ng of RNA remained intact. Wild type SEA exhibited marked RNase activity against the yeast RNA; ~70 ng RNA remained intact after one hour, corresponding to >60% digestion. Incubation of the RNA with  $\Delta\omega 1$ -SEA from the experimental groups, RNP, RNP + ssODN, pLV- $\omega 1X1$ , and pLV- $\omega 1X1$ +ssODN, resulted in ~30% substrate digestion, with 124, 140, 135 and 153 ng of RNA remaining, respectively. All conditions for programmed genome editing resulted in less digestion of the yeast RNA than for wild type SEA ( $p \leq 0.0001$ ) (Fig. 3C, D). Moreover, the  $\Delta\omega 1$ -SEA with programmed knock-in exhibited less RNase activity than  $\Delta\omega 1$ -SEA prepared without the donor ssODN repair template ( $p \leq 0.01$ ).

### **Depleting SEA of $\omega 1$ down-regulated Th2 response**

The  $\omega 1$  ribonuclease alone is capable of conditioning human monocyte-derived dendritic cells to drive Th2 polarization [22] and enhanced CD11b<sup>+</sup> macrophage modulation of intracellular toll like receptor (TLR) signaling [30]. Ribonuclease  $\omega 1$  inhibited TLR-induced production of IL-1 $\beta$  and redirected the TLR signaling outcome towards an anti-inflammatory posture via the mannose receptor (MR) and dectin [22, 49, 50]. The human monocytic cell line, THP-1, and the Jurkat human CD4<sup>+</sup> T cell line were employed to investigate the interaction of antigen presenting cells and T cells [51, 52]. At the outset, the THP-1 cells were differentiated to macrophages for 48 hours, then pulsed with SEA or  $\Delta\omega 1$ -SEA for 48 hours, after which the Jurkat CD4<sup>+</sup> T cells were added to the wells. Subsequently, the co-culture continued for 72 hours. Representative cytokines, including IL-4, IL-5, IL-13, IL-2, IL-6, IL-10, TNF- $\alpha$  and IFN- $\gamma$ , were quantified in supernatants of the co-cultures (Fig. 4). SEA from  $\omega 1$ -mutated eggs induced reduced levels of Th2 cytokines, including IL-4 and IL-5, in comparison to wild type SEA ( $p \leq 0.01$ ), and a trend

towards less IL-13 production was also observed (Fig. 4). Moreover, reduced levels of IL-6 and TNF- $\alpha$  were observed ( $p \leq 0.01$ ). By contrast, significant differences in levels of IL-10 and IL-2 were not evident between the WT- and mutant-SEA groups. IFN- $\gamma$  was not detected following pulsing with the WT-SEA or mutant-SEA (Fig S6).

### **Granulomatous inflammation markedly reduced in lungs of mice injected with $\Delta\omega 1$ eggs**

Following the entrapment of eggs in the intestines, liver and eventually lungs, the glycosylated  $\omega 1$  ribonuclease represents the principal stimulus that provokes the development of the circumoval granuloma, necessary for extravasation of the eggs [53]. A long-established model of the schistosome egg granuloma employs tail vein injection of eggs into mice, which leads to formation of circumoval granuloma in the mouse lung [54-56]. The latter approach has been extensively employed for immunopathogenesis-related studies of  $\omega 1$  [16]. Accordingly, to elicit circumoval granulomas, ~3,000 WT or  $\Delta\omega 1$  LE were injected into the lateral vein of the tail of BALB/c mice. The mice were euthanized 10 days after injection, and the entire left lung was removed, fixed, sectioned, and stained for histological analysis (Fig. 5). Representative digital microscopic images of the whole mouse lungs acquired through high-resolution 2D digital scans are presented in Figure 5, panels A-F. At low magnification (2 $\times$ ), severe and widespread inflammation was visible in lungs exposed to WT eggs compared to  $\Delta\omega 1$  eggs. In addition, markedly more intense and dense focal inflammation was induced by WT compared to  $\Delta\omega 1$  eggs (Fig. 5A). Granulomas were not seen in control naïve mice not exposed to schistosome eggs (Fig. 5C). At 20 $\times$  magnification, considerable disparity in volume of the circumoval granulomas was observed for WT versus  $\Delta\omega 1$  LE (Fig. 5A1-A2, 5D, 5E vs Figs. 5B1-B2, 5F, G). The volume of granulomas surrounding single schistosome eggs was quantified; those surrounding WT eggs in lungs of the mice were 18-fold greater than for  $\Delta\omega 1$  eggs,  $21 \times 10^{-2} \pm 1.61 \times 10^{-3} \text{ mm}^3$  and  $0.34 \times 10^{-2} \pm 0.12 \times 10^{-4} \text{ mm}^3$  (mean  $\pm$  S.E., 17-26 granulomas per mouse), respectively ( $P < 0.0001$ ) (Fig. 5H). The experiment was repeated with 3-4 mice per group with similar outcome. The findings documented marked deficiency in the induction of pulmonary granulomas by the  $\Delta\omega 1$  compared to WT eggs of *S. mansoni*.

### **GenBank/EMBL/DDBJ**

**Database accessions** Sequence reads from the amplicon NGC libraries are available at the European Nucleotide Archive, study accession number ERP110149. Additional information is available at Bioproject PRJNA415471, <https://www.ncbi.nlm.nih.gov/bioproject/PRJNA415471> and GenBank accessions SRR6374209, SRR6374210.

# Discussion

Using *Schistosoma mansoni* as an exemplar, we have demonstrated the activity and feasibility of programmed CRISPR/Cas9 genome editing in the phylum Platyhelminthes. On-target genome editing was evidenced by site-specific mutations in the  $\omega 1$  locus in chromosome 1. The chromosomal lesion induced by CRISPR/Cas9 was repaired by the non-homologous end joining (NHEJ) pathway [57] in the absence of a donor oligonucleotide and by homology directed repair (HDR) when a single stranded donor oligonucleotide was provided as the repair template [58-60].

The CRISPR/Cas9 components were successfully delivered to cultured schistosome eggs both using electroporation of a ribonucleoprotein particle (RNP) complex and using a lentiviral virion delivery system, in similar fashion to earlier reports in cell lines, tissues and entire organisms [61-64]. Delivery of RNPs provides the possibility for immediate editing, although the short half-life of the RNP components may be disadvantageous. Delivery of the CRISPR components on plasmids and by viral-mediated infection may provide sustained activity, transgene integration in non-dividing cells, and other attributes [33, 65]. Transfection by LV provides a hands-free approach to enable scaling of gene editing and the potential that less accessible and/or differentiated cells can be reached.

The genomic DNAs recovered from ~10,000 CRISPR/Cas9-treated LE would have included thousands of copies of the schistosome genome. We investigated the performance and efficiency of programmed genome editing by several approaches including NGS based analysis of pooled genomic DNAs of experimental and control groups of schistosome eggs. Analysis of the deep-coverage reads of amplicons spanning the predicted DSB site in the  $\omega 1$  locus revealed that ~4.5% of the reads were mutated by insertions, deletions, and substitutions. The target locus was mutated by knock-in (KI) of a ssODN repair template bearing short homology arms to mediate homology directed repair following DSB at  $\omega 1$ , with an efficiency for HDR of 0.19% insertion of the donor transgene. The numerous substitutions compared to deletions and insertions were noteworthy. However,  $\omega 1$  is a multi-copy gene and some apparent substitutions may reflect single nucleotide polymorphisms (SNPs) among the multiple gene copies.

The schistosome liver eggs (LE) exposed to genome editing spanned the spectrum of egg development, ranging from newly laid to fully mature [11]. When released from adult female schistosomes into the mesenteric veins, the ova each contain single celled zygotes surrounded by 30 to 40 vitelline cells [27]. By six or so days later, the miracidium within the eggshell is a mobile, ciliated larva comprised of organs, tissues, muscles and nerves [25, 66-68]. This investigation targeted the multicellular LE, and therefore our manipulations focused on somatic (rather than germ line) genome editing [65]. In addition, given the multicopy nature of  $\omega 1$ , the numerous cells in each of the schistosome eggs [66] the spectrum of development of these eggs, the diverse mutation profile of NHEJ, and the other contributions to variability (below), mosaicism of mutations were expected, i.e. some displayed HDR but not NHEJ, some NHEJ but not HDR, other cells and NHEJ and HDR, and many retained the wild type genotype. As well as the expected relative ease of access by the RNPs, virions and ssODN to the cells of syncytial inner envelope compared to the cells within the miracidium, other factors may have contributed to variability of CRISPR efficiency among the eggs and the cells within individual eggs. Cells exposed to CRISPR/Cas9 components may not have entered mitosis; HDR proceeds at cell division, with the cell at late S phase or G2 following completion of DNA replication where the



sister chromatid can act as the repair template [69]. Otherwise, NHEJ proceeds to repair the DSB. Whereas incubating the eggs in virions would be expected to ensure that virions contacted every egg, the coverage of infection was not assessed, and nor for the RNPs and the subsequent transduction by ssODN.

Expression levels of  $\omega 1$  were diminished by as much as 83% relative to controls suggesting that Cas9 catalyzed the mutation of  $\omega 1$ , and that programmed Cas9-induced DSBs had been resolved by NHEJ and/or HDR. Knock-in of the ssODN repair template induced 81-83 % reduction in  $\omega 1$ -specific mRNA levels, whereas down regulation of 45 to 67 % followed the exposure of eggs to RNP or lentivirus without ssODN. Notably, less than 5% efficiency in gene editing, based on analysis of the NGS reads, appeared to account for this markedly reduced (>80%) gene expression. The possibility of large-scale deletions, as reported in *Strongyloides stercoralis* [40], offered one explanation for this apparent paradox. However, qPCR analysis of  $\omega 1$  copy number did not reveal apparent differences between treatments and controls. An alternative explanation for the paradox may be the tight tissue specific expression of  $\omega 1$ , which not only is expressed only in the egg developmental stage of *S. mansoni* (Fig. S1C) [70] and, moreover, only occurs within the syncytial ‘inner envelope’ of squamous, epidermal-like cells surrounding the miracidium [66]. Expression of  $\omega 1$  appears to be tightly developmentally regulated [35]; based on comparison of expression in the egg to expression in the miracidium, immunostaining and transmission electron microscopy of the mature egg, all or most expression of  $\omega 1$  takes place in the mature egg and not in immature eggs or other larval or adult stages [20, 25, 27, 29, 71]. Within the mature egg, the fully developed miracidium is surrounded by a squamous, syncytial epithelium termed variously as the envelope, the inner envelope, or von Lichtenberg’s envelope [25, 27, 66, 67]. This syncytial layer is metabolically active [27], and likely the site of synthesis of T2 ribonuclease  $\omega 1$  that is released from the egg [25, 27, 29], along with other secreted/excreted proteins that help facilitate egress of the egg from the blood vessels and through the wall of the intestine [27]. The virions may not have infected many of the cells within mature eggs, because after entry into the egg the virus would be expected to contact the syncytial envelope, rather than traveling further to directly contact cells of the miracidium. That is, the efficiency of gene editing may not have been high across all cells of an egg but may (due to ease of access to certain cells) have had highest efficiency in those cells in which  $\omega 1$  is expressed. This may explain the large reduction in  $\omega 1$  transcripts in the CRISPR-treated eggs relative to the control eggs.

Whereas wild type SEA polarized Th2 cytokine responses including IL-4 and IL-5 in human macrophage/T cell co-cultures, significantly reduced levels of these cytokines were observed when the cells were exposed to  $\omega 1$ -mutated SEA. Moreover, following introduction of eggs into the tail vein of mice, pulmonary circumoval granulomas were substantially reduced in size around  $\Delta \omega 1$  eggs compared to granulomas and the inflammation provoked by wild type eggs. Whereas this outcome extends earlier findings using lentiviral transduction of eggs of *S. mansoni* to deliver microRNA-adapted short hairpin RNAs aiming to silence expression of  $\omega 1$  [16], the reduction in granuloma volume was far more prominent in the present study. In addition to incomplete disruption of all copies of  $\omega 1$ , residual granulomas around the mutant eggs may be due to the presence of other Th2-polarizing components within SEA that have recently been reported [72]. Given that the T2 ribonuclease  $\omega 1$  is the principal, major type 2-polarizing protein



among egg-secreted proteins [19, 20], our findings of a phenotype characterized by the absence or diminutive granulomas provide functional genomics support to this earlier advance [22].

The findings confirmed that somatic genome editing of schistosome eggs led to functional knockout of the  $\omega 1$  T2 ribonuclease, and mosaicism of mutant and wild type cells. The genome-edited eggs exhibited loss of function of  $\omega 1$  but remained viable. Programmed mutation of  $\omega 1$  using CRISPR/Cas9 not only achieved the aim of establishing the applicability of genome editing for functional genomics of schistosomes but also demonstrated manipulation of a gene expressed in the schistosome egg, the developmental stage central to the pathophysiology of schistosomiasis. This study provides a blueprint for editing other schistosome genes, and those of trematodes and platyhelminths at large. The challenge for future studies is now to deliver pseudotyped virions and programmed genome editing to the schistosome germ line. Mutant parasite lines derived following this protocol [11, 73] will enable more comprehensive understanding of the pathogenesis of this neglected tropical disease and accelerate the discovery of novel strategies for parasite control.

## Materials and Methods

### Ethics statement

Mice experimentally infected with *S. mansoni*, obtained from the Biomedical Research Institute, Rockville (BRI), MD were housed at the Animal Research Facility of the George Washington University Medical School, which is accredited by the American Association for Accreditation of Laboratory Animal Care (AAALAC no. 000347) and has an Animal Welfare Assurance on file with the National Institutes of Health, Office of Laboratory Animal Welfare, OLAW assurance number A3205-01. All procedures employed were consistent with the Guide for the Care and Use of Laboratory Animals. The Institutional Animal Care and Use Committee of the George Washington University approved the protocol used for maintenance of mice and recovery of schistosomes. Studies with BALB/c mice involving tail vein injection of schistosome eggs and subsequent euthanasia using overdose of sodium pentobarbitone was approved by the IACUC of the Biomedical Research Institute (BRI), protocol 18-04, AAALAC no. 000779 and OLAW no. A3080-01.

### Schistosome eggs

Mice were euthanized seven weeks after infection with *S. mansoni*, livers were removed at necropsy, and schistosome eggs recovered from the livers, as described [74]. The liver eggs termed 'LE' were maintained in RPMI medium supplemented with 10% heat inactivated fetal bovine serum (FBS), 2% streptomycin/penicillin and protease inhibitor cocktail (Sigma) at 37°C under 5% CO<sub>2</sub> in air [73, 75]. Polymyxin B to 10 µg/ml was added to the cultures twice daily to neutralize lipopolysaccharide (LPS) [76]. Soluble egg antigen (SEA) was prepared from these eggs, as described [23, 54]. In brief, the homogenate of eggs in 1×PBS containing protease inhibitor cocktail (Sigma) was frozen and thawed twice, clarified by centrifugation at 13,000 rpm, 15 min, 4°C, the supernatant passed through a 0.22-µm pore size membrane. Protein concentration of the supernatant (SEA) were determined by the Bradford Protein Assay [77] and aliquots of the SEA stored at -80°C.

### Guide RNAs, Cas9, and single stranded DNA repair template

Single guide RNA (sgRNA) was designed using the web-based tools at <http://bioinfogp.cnb.csic.es/tools/breakingcas/> [78] to predict cleavage sites for the *Streptococcus pyogenes* Cas9 nuclease within the genome of *S. mansoni*. The sgRNA targeted exon 6 of the *ωl* gene, Smp\_193860, [www.genedb.org](http://www.genedb.org), residues 3808-3827, adjacent to the protospacer adjacent motif, AGG (Fig. 1A). This is a multi-copy gene with at least five copies of *ωl* located in tandem on chromosome 1 [12]. To infer the gene structure of Smp\_193860 in the *S. mansoni* V5 assembly more accurately, the omega-1 mRNA DQ013207.1 sequenced by Fitzsimmons *et al.* (2005) [29] was used to predict the gene structure with the exonerate software, by aligning it to the assembly using the exonerate options '--model coding2genome' and '--maxintron 1500'. The Smp\_193860 copy of *ωl* includes nine exons interspersed with eight introns (6,195 nt) (Fig. 1A).

Synthetic gRNA (sgRNA), *ωl*-sgRNA was purchased from Thermo Fisher Scientific (Waltham, MA). A double stranded DNA sequence complementary to the sgRNA was inserted into lentiviral gene editing vector, pLV-U6g-EPCG (Sigma), which encodes Cas9 from *S. pyogenes* driven by the eukaryotic (human) translation elongation factor 1 alpha 1 (tEF1) promoter and the sgRNA driven by the human U6 promoter (Fig 1C). (The pLV-U6g-EPCG vector is tri-cistronic and encodes the reporter genes encoding puroR and GFP, in addition to Cas9 [79].) This gene-editing construct, targeting exon 6 of *ωl* Smp\_193860, was termed pLV-*ωl*X1. A single stranded oligodeoxynucleotide (ssODN), which included homology arms of 50 nt each in length at the 3' (position 3774-3824 nt) and 5' (3825-3874 nt) flanks and a small transgene (5'-TAAGTGACTAGGTAAGTCTGAGTAG-3', encoding stop codons (six) in all open-reading frames) (Fig. 1B), was synthesized by Eurofin Genomics (KY, USA). An oligonucleotide primer that included this sequence was employed in PCRs to investigate the presence of CRISPR/Cas9-programmed insertion of the transgene [80] (Table S2).

### Transfection of schistosome eggs with a Cas9/guide RNA complex

For the ribonucleoprotein (RNP) complex of the *ωl*-sgRNA and recombinant Cas 9 from *Streptococcus pyogenes*, 3 µg of *ωl*-sgRNA and 3 µg of Cas9-NLS nuclease (Dharmacon, Lafayette, CO) were mixed in 100 µl Opti-MEM (Sigma) to provide 1:1 ratio w/w RNP. The mixture was incubated at room temperature for 10 min, pipetted into a 4 mm pre-chilled electroporation cuvette containing ~10,000 LE in ~150 µl Opti-MEM, subjected to square wave electroporation (one pulse of 125 volts, 20 milliseconds) (BTX ElectroSquarePorator, ECM830, San Diego, CA). The electroporated eggs were incubated for 5 min at room temperature, and maintained at 37°C, 5% CO<sub>2</sub> in air for 3, 5 and 7 days. To investigate whether homology-directed repair (HDR) could catalyze the insertion of a donor repair template, 3 µg ssODN was mixed with RNP and the LE before electroporation. In a second approach (above), the ssODN was delivered to LE by electroporation at ~24 hours after the lentiviral transduction of the LE. The eggs were collected 3, 5 and 7 days later and genomic DNA recovered from LE. The negative controls included LE subjected to electroporation in the presence of only Opti-MEM, only Cas 9, only sgRNA, and only ssODN.

### Transduction of schistosome eggs with lentiviral particles

*Escherichia coli* Zymo 5α (Zymo Research) cells were transformed with lentiviral plasmid pLV-*ωl*X1 and cultured in LB broth in 100 µg/ml ampicillin at 37°C, agitated at 225 rpm for ~18 hours, after which plasmid DNA was recovered (GenElute Plasmid purification kit, Invitrogen). A lentiviral (LV) packaging kit (MISSION, Sigma-Aldrich) was used to prepare LV particles in

producer cells (human 293T cell line). In brief,  $2.3 \times 10^5$  of 293T cells/well were seeded 6-well tissue culture plate in DMEM supplemented with 10% heat-inactivated fetal bovine serum (FBS), 2 mM L-glutamine, 2% penicillin/streptomycin and cultured at 37°C, 5% CO<sub>2</sub> for 18 hours. The producer cells were transfected using FUGENE 6 (Promega) with pLV- $\omega$ 1X1 and LV packaging mix containing two additional plasmids; one plasmid that expressed HIV structural and packaging genes and another that expressed the pseudotyping envelope protein Vesicular Stomatitis Virus Glycoprotein (VSVG). Subsequently, the transfection mixture (37.5  $\mu$ l; 500 ng plasmid DNA, 4.6  $\mu$ l packaging mix, 2.7  $\mu$ l of FUGENE 6 in Opti-MEM) was dispensed drop wise into each well on the plate. Sixteen hours later, the media were removed from the transfected cells, replaced with pre-warmed complete DMEM, and cells cultured for 24 hours. The supernatant, containing VSVG-pseudotyped LV particles was filtered through 22  $\mu$ m pore size membranes [43], and stored at 4°C. Additional pre-warmed complete DMEM was added to the well, for culture for a further 24 hours. The supernatant was collected as above, combined with the first supernatant and concentrated (Lenti-X concentrator, Takara Bio, Mountain View, CA). Virion titer was estimated by two methods; first, by use of Lenti-X-GoStix (Takara Bio) to establish the presence of functional virions at  $>10^5$  infectious units (IFU)/ml, and second, by reverse transcriptase assay [43, 81] to quantify levels of active virions. Virions with counts of  $\sim 4 \times 10^6$  count per minute (cpm)/ml were aliquoted and stored at -80°C.

To transduce LE with LV,  $\sim 10,000$  eggs were incubated for 24 hours in complete DMEM containing 500  $\mu$ l of  $\sim 4 \times 10^6$  cpm/ml VSVG-LV virions. Thereafter, the LE were washed three times in 1 $\times$ PBS and transfected with ssODN by square wave electroporation or further steps. LV virions heat-inactivated by incubation at 70°C for two hours [43] with subsequent transfection with the ssODN, transfection with ssODN in the absence of virions or Opti-MEM only served as negative controls.

### **PCR amplification of diagnostic transgene to detect knock-in into exon 6 of $\omega$ 1**

For each DNA sample, four separate PCR assays using four distinct primer pairs (Table S2) were carried out. The first  $\omega$ 1 primer pair, to amplify locations 3751-4740 nt of Smp\_193860, was employed as positive control for the presence of genomic DNA with the Smp\_193860 copy of  $\omega$ 1. The other primer pairs shared one forward primer complementary to the knock-in 24 nt transgene with three reverse primers, Sm  $\omega$ 1-R1, -R2 and -R3 at positions 3966-3984, 4066-4085 and 4102-4121 nt, respectively, binding to three sites downstream the  $\omega$ 1 predicted DSB site (Fig. 2A; Table S2) [80]. The PCR mix included 10  $\mu$ l Green GoTaq DNA polymerase mix (Promega) with 200 nM of each primer and 10 ng genomic DNA. Thermal cycling conditions involved denaturation at 95°C, 3 min followed by 30 cycles of 94°C, 30 sec, 60°C, 30 sec and 72°C, 30 sec and a final extension at 72°C for 5 min. Following agarose gel electrophoresis (1.2% agarose/TAE), amplicons of the expected sizes were recovered from gels and ligated into pCR4-TOPO (Thermo Fisher). *E. coli* Zymo 5 $\alpha$  competent cells were transformed with the ligation products, several colonies of each transformant were grown under ampicillin selection, plasmid DNA purified, and insert sequenced to confirm the presence and knock-in of the transgene (Fig. 1C).

### **Illumina sequencing**

Pooled LE DNA samples from six independent KI experiments of pLV- $\omega$ 1X1 with ssODN were used as the template to amplify the on-target DNA fragment using MiSeq primers (Fig. 2A) with

High Fidelity *Taq* DNA polymerase (Thermo Fisher). PCR reactions were set up with 10 ng LE DNA samples from the KI experiment in 25 µl reaction mix using the HiFidelity *Taq* DNA polymerase (Thermo Fisher) following the PCR program 94°C for 3 minutes of denaturation followed by 30 cycles of 94°C for 30 seconds, 60°C or 54°C or 30 seconds, 72°C 45 seconds and final extension at 72°C for 2 minutes. The expected size of the amplicon flanking predicted DSB was 205 bp. Amplicons of this size were purified by Agencourt AMPure XP (Beckman Coulter), amplicons generated from four different PCR reactions from each sample were pooled, and 100 ng of amplicons from each sample used to construct the uniquely indexed paired-end read libraries using the QIAseq 1-step Amplicon Library Kit (Qiagen) and GeneRead Adapter I set A 12-plex (Qiagen). These libraries were pooled, and the library pool was quantified using the QIAseq Library Quant System (Qiagen).

Samples (10) (Table S3) were multiplexed and each run on four MiSeq lanes. After sequencing, the fastq files for each particular sample were merged. Samples 1-6, 8 and 10 were prepared using an annealing temperature of 54°C. Samples 7 and 9 were prepared using an annealing temperature of 60°C, and included an extra 10 bp at the start of the MiSeq sequences, 'GTTTTAGGTC', present upstream of the 5' primer in the genomic DNA. We trimmed this sequence from the reads using cutadapt v1.13 [82]. To detect HDR events, CRISPResso v1.0.9 [46, 83] was employed using a window size of 500 bp (-w 500) with the reference amplicon according to gene *Smp\_193860* in the *S. mansoni* V7 assembly, and with the --exclude\_bp\_from\_left 25 and --exclude\_bp\_from\_right 25 options in order to disregard the (24 bp) primer regions on each end of the amplicon when indels are being quantified. A window size of 500 nt was employed to include the entire amplicon. In order to search for HDR events, CRISPResso checked for HDR events (using -e and -d options) in treatment groups including controls. To infer frameshifts using CRISPResso the -c option was used, giving CRISPResso the coding sequence from positions 42-179 of the amplicon. To confirm the insertions of the knock-in sequences reported by CRISPResso (column L in Table S3), we took all insertions of 20-28 bp reported by CRISPResso, and calculated their percent identity to the expected knock-in sequence using ggsearch v36.3.5e in the fasta package [84], and an insertion was considered confirmed if it shared ≥75% identity to the expected donor knock-in sequence.

# **Copy number estimation for $\omega 1$**

A quantitative PCR to estimate the relative copy number of  $\omega 1$  was performed using Kapa qPCR mastermix SYBRfast (KK4602) on 1 ng of gDNA templates isolated from control and test samples, in 20 µl volumes. Primer pair OMGgRNA1F and OMGgRNA1R was used to amplify the  $\omega 1$  gRNA target region and SmGAPDH (*Smp\_056970*) as reference single-copy gene (primers shown in Table S2). The PCR efficiencies for primer pairs were estimated by titration analysis to be 100% ±5 [85] and qPCRs were performed in triplicate in 96-well plates, with a denaturation step at 95°C of 3 min followed by 40 cycles of 30 s at 95°C and 30 s at 55°C, in thermal cycler fitted with a real time detector (StepOnePlus, Applied Biosystem). The relative quantification assay  $2^{-\Delta\Delta C_t}$  method [86] was used to ascertain the relative copy number of  $\omega 1$ . Relative copy number of  $\omega 1$  copy number in the CRISPR/Cas9 treated groups reflects the fold change of  $\omega 1$  copy number normalized to the reference gene (Sm GAPDH) and relative to the untreated control group (calibrator sample with relative  $\omega 1$  copy number = 1) [47].

# **Gene expression for $\omega 1$ mRNA**



Total RNAs from schistosome eggs were extracted using the RNazol RT reagent (Molecular Research Center, Inc), which eliminates contaminating DNA [87], and concentration and purity determined using a spectrophotometer ( $OD_{260/280} \sim 2.0$ ). Reverse transcription (RT) of the RNA (500 ng) was performed using iScript Reverser Transcript (Bio-Rad), after which first strand cDNA was employed as template for qPCRs using SsoAdvanced Universal SYBR Green Supermix (Bio-Rad) performed in triplicates in a iQ5 real time thermal cycler (Bio-Rad). RT-qPCR reaction mixtures included 2  $\mu$ l first strand cDNA, 5  $\mu$ l SsoAdvanced universal SYBR Green Supermix, and 300 nM schistosome gene specific primers. Table S2 provides details of the oligonucleotide primers. Thermal cycling included denaturation at 95°C for 30 sec, 40 amplification cycles each consisting of denaturation at 95°C for 15 sec and annealing/extension at 60°C for 30 sec, and a final melting curve. The output was analyzed using the iQ5 software. Relative expression of calculated using the  $2^{-\Delta\Delta C_t}$  method and normalized to schistosome GAPDH expression [86]; data are presented as transcript levels (three replicates) compared to the WT (100%) LE, and fold change reported as mean relative expression  $\pm$  SD.

# **RNase activity of $\omega$ 1**

A stock solution of yeast RNA (Omega Bio-tek, Norcross, GA) was prepared at 1.0  $\mu$ g/ $\mu$ l, 50 mM Tris-HCl, 50 mM NaCl, pH 7.0. Yeast RNA (200 ng) was incubated with 2  $\mu$ g SEA from control and experimental groups individually at 37°C for 60 min. (SEA investigated here, named  $\Delta\omega$ 1-SEA, was extracted LE transduced with pLV- $\omega$ 1X1 virions and ssODN, pooled from six biological replicates.) RNase A, an endoribonuclease from bovine pancreas (Thermo Fisher) served as a positive control enzyme whereas yeast RNA in reaction buffer only served as the negative control. The RNase activity of  $\omega$ 1 in wild type SEA or  $\Delta\omega$ 1-SEA was analyzed by visualizing and quantifying the substrate that remained following enzymolysis by agarose gel electrophoresis and staining with ethidium bromide. The yeast RNA digestion by control SEAs or  $\Delta\omega$ 1-SEA were set up in triplicates, with quantity of residual RNA determined by densitometry [48].

# **Macrophage polarization by WT or $\Delta\omega$ 1-SEA and T-cell activation *in vitro***

Human monocytic THP-1 cells were maintained in Roswell Park Memorial Institute medium (RPMI) 1640 with L-glutamine, HEPES (Thermo Fisher Scientific) containing 10% (v/v) FBS with 4 mM glutamine, 25 mM HEPES, 2.5 g/L D-glucose at 37°C in 5% CO<sub>2</sub> in air. THP-1 cells were non-adherent cells. In a 6-well plate, THP-1 monocytes ( $3 \times 10^5$  cells in each well) were differentiated into macrophages (M $\phi$ ) by incubation in 150 nM phorbol 12-myristate 13-acetate (PMA) (Sigma) for 48 hours [88]. M $\phi$  were exposed to SEA (50 ng/ml) or  $\Delta\omega$ 1-SEA (50 ng/ml) (from LE transduced with pLV- $\omega$ 1X1 virions and ssODN) for 48 hours. To investigate macrophage and T cell interactions, M $\phi$  cells were pulsed with 50 ng/ml SEA or  $\Delta\omega$ 1-SEA and thereafter co-cultured in direct contact with Jurkat (human CD4<sup>+</sup> T) cells. Nine  $\times 10^5$  Jurkat were added to M $\phi$  and direct contact, co-cultured for an additional 72 hours. Cell-free supernatants from the co-cultures were collected to quantify secretion of T helper cell cytokines including IL-4, IL-5, IL-13, IL-10, TNF- $\alpha$ , IL-6, IL-2 and IFN- $\gamma$  by enzyme linked immunosorbent assay (ELISA) (Qiagen) [89]. The assay included positive controls for each analyte, which were provided in the ELISA kit (Qiagen). Three biological replicates were undertaken.

# **Schistosome egg-induced primary pulmonary granulomas**

For induction of circumoval, egg-induced granulomas in the lungs of mice, 8 week old female [25] BALB/c mice were injected with 3,000 WT egg or  $\Delta\omega 1$ -egg or 1×PBS as negative control by tail vein, as described [56]. The mice (6-9 mice/group) were euthanized 10 days later. For histopathological assessment of granuloma formation, the left lung was removed at necropsy and fixed in 10% formalin in pH 7.4 buffered saline for 24 hours, after which it was dehydrated in 70% ethanol, and clarified in xylene. The fixed lung tissue was embedded in paraffin and sectioned at 4- $\mu$ m-thickness by microtome [56]. Thin sections of the left lung lobe were mounted on glass slides and fixed at 58-60°C. Subsequently, rehydrated sections were stained with hematoxylin-eosin (H&E) for evaluation of inflammatory infiltrates and cellularity of granulomas. The longest (R) and shortest (r) diameters of each granuloma containing a single egg were measured with an ocular micrometer, and the volume of the granuloma calculated assuming a prolate spheroidal shape, using  $4/3 \pi Rr^2$  [25]. All granulomas in all slides from the left lung of the mice, 15 slides per treatment group, were measured; in total, >100 granulomas from each treatment group. Digital images were captured using a 2D glass slide digital scanner (Aperio Slide Scanner, Leica Biosystems, Vista, CA) and examined at high magnification using the Aperio ImageScope (Leica) software [55, 90].

## Statistics

Means for experimental groups were compared to controls by one-way ANOVA and, where appropriate, by two-tailed Student's *t*-test and Welch's unequal variances *t*-test (GraphPad Prism, La Jolla, CA). Values for *p* of  $\leq 0.05$  were considered to be statistically significant.

## Acknowledgements

We thank Dragana Jankovic, Alan Sher, Thomas Wynn, Michael Bukrinsky, Larisa Dubrovsky, Arnon Jurberg, Robert Thompson, Thiago De Almeida Pereira, Meredith Brindley and Luca Pinello for advice and technical assistance. Schistosome-infected mice and snails were provided by the NIAID Schistosomiasis Resource Center of the Biomedical Research Institute, Rockville, Maryland through NIH-NIAID Contract HHSN272201000005I for distribution through BEI Resources. These studies were supported by Wellcome Trust Strategic Award number 107475/Z/15/Z (Hoffmann, K.F., principal investigator), award R21AI109532 (GR, PJB) award from NIAID, National Institutes of Health, Wellcome Trust grant WT 098051 and, in part, by generous support from MaxMind Inc./TJ Mather.



## Figure legends

**Figure 1. Genomic structure of the locus encoding omega-1 ( $\omega$ 1) in the genome of *Schistosoma mansoni*, guide RNA and CRISPR/Cas9 encoding construct.** Gene model of  $\omega$ 1 (Smp\_193860), showing the position of its nine exons, eight introns and UTRs 6,195 bp on chromosome 1 (panel A). Nucleotide sequence in exon 6 indicating location and sequence of gRNA target site, predicted double stranded break (DSB) (arrow), protospacer adjacent motif (PAM) (AGG, blue box), and 124-nucleotide sequence of the single stranded DNA donor template provided for DSB repair by homologous recombination. Homology arms of 50 nt span a central 24 nt of six-stop-codon transgene (B). Linear map of pLV- $\omega$ 1X1 showing position of regulatory and coding regions for CRISPR/Cas9 editing; the positions of human U6 promoter to drive gRNA, translational elongation factor EF $\alpha$ -1 promoter driving Cas9 from *Streptococcus pyogenes*, and the left and right long terminal repeats of the lentiviral vector derived from HIV-1 (C).

**Figure 2. Programmed chromosomal break at  $\omega$ 1 locus repaired by homologous recombination from donor template.** Schematic diagram to indicate positions of primer binding sites (blue arrows), with the foreign gene cassette as the forward primer (Sm $\omega$ 1X1-6-stop codons cassette-F) paired with three discrete reverse primers, Sm $\omega$ 1-R1, Sm $\omega$ 1-R2 and Sm $\omega$ 1-R3 from the  $\omega$ 1 locus and a primer pair for target amplicon NGS library amplification; miSeq-F and miSeq-R (panel A). The control PCR amplicon was generated using the Sm $\omega$ 1-control-F and -R primers. The green box shows the location of 5' and 3' homology arms, red box and arrow indicate the stop codon bearing transgene. B, PCR products visualized in ethidium bromide-stained agarose gel demonstrating Cas9-catalyzed target site-specific insertional mutagenesis in exon 6 of the  $\omega$ 1 gene. Evidence for transgene knocked-in into programmed target site revealed by amplicons of the expected sizes in lanes R1, R2 and R3, of 184, 285 and 321 bp, respectively (arrows at left) spanned the mutated site in the genomic DNAs pooled from schistosome eggs, including a positive control flanking the insert site (991 bp). The control DNA result shown in this gel was isolated from heat inactivated-pLV- $\omega$ 1X1 virions and ssODN treated LE. Similar findings were obtained when programmed gene editing was executed by lentiviral virion-delivered Cas9 and  $\omega$ 1-gRNA transgenes and by ribonucleoprotein complex (RNP) delivered by square wave electroporation (supporting information). The non-KI control groups (sgRNA only, heat-inactivated pLV- $\omega$ 1X1 virions only, ssODN only) showed no amplicons by stop cassette-KI primers with R1, R2 or R3 (Fig. S4). C, Multiple sequence alignments confirmed the presence of the 24 nt transgene inserted precisely into the exon 6 of  $\omega$ 1 locus from KI-R1, -R2 and -R3 fragments compared with  $\omega$ 1 wild type (WT). The white box on  $\omega$ 1-WT indicates the absence of the transgene sequence and white boxes on KI-R1, -R2 and -R3 fragments show locations of substitutions relative to the other  $\omega$ 1 copies (Smp\_184360): 2 bp (AT to CC) mismatches at positions 253-254 nt. All three contained the (knock-in) insertion sequence (white box), which confirmed targeted mutation of the  $\omega$ 1 gene. D-F. Illumina deep sequence analysis of amplicon libraries revealed Cas9 induced on-target repair of programmed gene mutation of the  $\omega$ 1 locus by deletions, insertions, and substitutions by CRISPResso analysis. D. Frequency distribution of position-dependent deletions and of deletion sizes; these varied from point mutations to >20 bp adjacent to the DSB. The dotted line indicates the predicted position of the programmed double stranded break. E. Frequency of frameshift versus in-frame mutations reported by CRISPResso. The pie charts show the fraction of all mutations

(indels and substitutions) in the coding region (positions 42-179) of the amplicon predicted to induce frameshifts, i.e. indels of 1-2 bp, or multiples thereof. (a) corresponds to sample 2 (eggs only control) (Table S3), (b) corresponds to sample 9 (eggs exposed to virions and ssODN, i.e. CRISPR/Cas9-treated) (Table S3). Findings for control and treated samples are provided in Table S3. **F.** Insertions of the knock-in sequence. Number of amplicon reads containing an insertion of the knock-in sequence (with  $\geq 75\%$  identity to it) is shown in the Y-axis, and the position of the insertion relative to the reference amplicon is shown on the X-axis. The programmed Cas9 scission lies between positions 102 and 103. Samples 3, 7 and 9 are independent amplicon libraries (technical replicates) made from the same sample of genomic DNAs pooled from six biological replicates exposed to virions and ssODN. The insert shows a sequence logo, created using WebLogo [91], of the sequences of the 3,826 sequence reads from samples 3, 7 and 9, with insertions of 24 bp at position 102; most matched the donor template, TAAGTGACTAGGTAAGTACTGAGTAGC.

**Figure 3. Diminished  $\omega 1$ -specific transcript levels and ribonuclease T2 activity following programmed editing.** Panel **A.**  $\omega 1$  mRNA abundance was reduced up to  $\sim 70\%$  after genome editing by sgRNA/Cas9 complex and lentivirus systems, and markedly reduced  $>80\%$  with the addition of ssODN as the DNA repair donor. Relative expression of  $\omega 1$  transcripts at three days following CRISPR/Cas manipulation; mean  $\pm$  SD,  $n = 11$  (biological replicates);  $p \leq 0.0001$  (\*\*\*\*) ( $n=11$ ) (ANOVA). **B.** Stable reduction of  $\omega 1$  transcripts at days 5 and 7 after treatment (three biological replicates) in four experimental groups; RNP (black), RNP and ssODN (red), pLV- $\omega 1X1$  virions (green), pLV- $\omega 1X1$  virions and ssODN (blue) compared to controls. **C. Loss of RNase activity** as assessed by hydrolysis of yeast RNA. Residual yeast following exposure to SEA, visualized after gel electrophoresis; lane 1, buffer (negative control); 2, RNase A; 3-8, WT SEA and other control SEAs as indicated in D; 9-12,  $\Delta\omega 1$ -SEA from RNP, RNP and ssODN, pLV- $\omega 1X1$  virions, and pLV- $\omega 1X1$  virions and ssODN, respectively. **D.** Intact yeast RNA (nanograms) remaining following incubation with SEA (mean  $\pm$  SD,  $n = 6$ ). More RNA remained following incubation with  $\Delta\omega 1$ -SEA in all groups, RNP, RNP and ssODN, pLV- $\omega 1X1$  virions, and pLV- $\omega 1X1$  virions and ssODN treated SEA (blue) than in the WT SEA controls ( $p \leq 0.0001$ ). Among the gene edited experimental groups, more RNA remained when donor template was introduced at the same time as RNP or pLV- $\omega 1X1$  virions ( $p \leq 0.01$ ). Significant differences were not apparent among the WT SEA control groups.

**Figure 4. Reduced Th2 cytokine levels following exposure to  $\Delta\omega 1$ -SEA.** Panel **A.** Reduction in Th2 cytokines IL-4 and IL-5 but not IL-13 [92, 93] following pulsing of M $\phi$  (PMA induced-THP-1 cells) with  $\Delta\omega 1$ -SEA prior to co-culture with human CD4<sup>+</sup> T cells (Jurkat cell line) compared with WT-SEA pulsed-M $\phi$  (top panels). In addition, levels of IL-6 and TNF- $\alpha$  were reduced where M $\phi$  were first pulsed with  $\Delta\omega 1$ -SEA but not WT SEA. Differences were not evident for IL-10. The assay was carried out in triplicate;  $p < 0.0001$ ,  $\leq 0.0001$ , 0.0038 and 0.0252 indicated as \*\*\*\*, \*\*\*, \*\* and \*, respectively (one-way ANOVA, multiple comparison).

**Figure 5. Pulmonary circumoval granulomas revealed attenuated granulomatous response to  $\Delta\omega 1$  schistosome eggs.** Schistosome eggs ( $\sim 3,000$  eggs) that had been transduced with lentivirus virions encoding  $\omega 1$ -specific sgRNA and Cas9 in tandem with ssODN were introduced via the tail vein into mice. The mice were euthanized 10 days later; thin sections of the left lung were stained with H&E, and circumoval granulomas counted and measured. Representative 2D

scanned micrographs of granulomas inoculated with WT eggs (panel **A**) (2× magnification) and 20× magnification (a1 and a2), and with  $\Delta\omega 1$  eggs; **B** (2×), b1 and b2 (20×). **C**. Control mouse lung. **D, E**. Representative micrograph of individual, control egg induced-granuloma that were counted to assess for granuloma volume. **F, G**. Representative micrographs showing  $\Delta\omega 1$  egg induced-granulomas. All single egg induced-granuloma from WT and  $\Delta\omega 1$  eggs were measured and granuloma volume estimated [25]. **H**. Scatter plots of the volume ( $\text{mm}^3$ ) for individual granuloma, mean  $\pm$  SE (red) is shown. Granulomas induced by  $\Delta\omega 1$  eggs were significantly smaller than those surrounding WT eggs (Welch's *t*-test,  $p \leq 0.0001$ ,  $n > 100$ ).

## References

1. Gryseels B, Polman K, Clerinx J, Kestens L: **Human schistosomiasis**. *Lancet* 2006, **368**:1106-1118.
2. Hotez PJ, Brindley PJ, Bethony JM, King CH, Pearce EJ, Jacobson J: **Helminth infections: the great neglected tropical diseases**. *J Clin Invest* 2008, **118**:1311-1321.
3. Hotez PJ, Alvarado M, Basanez MG, Bolliger I, Bourne R, Boussinesq M, Brooker SJ, Brown AS, Buckle G, Budke CM, et al: **The global burden of disease study 2010: interpretation and implications for the neglected tropical diseases**. *PLoS Negl Trop Dis* 2014, **8**:e2865.
4. Colley DG, Bustinduy AL, Secor WE, King CH: **Human schistosomiasis**. *Lancet* 2014, **383**:2253-2264.
5. Berriman M, Haas BJ, LoVerde PT, Wilson RA, Dillon GP, Cerqueira GC, Mashiyama ST, Al-Lazikani B, Andrade LF, Ashton PD, et al: **The genome of the blood fluke *Schistosoma mansoni***. *Nature* 2009, **460**:352-358.
6. *Schistosoma japonicum* Genome S, Functional Analysis C: **The *Schistosoma japonicum* genome reveals features of host-parasite interplay**. *Nature* 2009, **460**:345-351.
7. Young ND, Jex AR, Li B, Liu S, Yang L, Xiong Z, Li Y, Cantacessi C, Hall RS, Xu X, et al: **Whole-genome sequence of *Schistosoma haematobium***. *Nat Genet* 2012, **44**:221-225.
8. Lepesant JM, Grunau C, Cosseau C: **Towards an understanding of the epigenetics of schistosomes: a comparative epigenomic study**. *Mem Inst Oswaldo Cruz* 2011, **106**:823-830.
9. Geyer KK, Rodriguez Lopez CM, Chalmers IW, Munshi SE, Truscott M, Heald J, Wilkinson MJ, Hoffmann KF: **Cytosine methylation regulates oviposition in the pathogenic blood fluke *Schistosoma mansoni***. *Nat Commun* 2011, **2**:424.
10. Vanderstraete M, Gouignard N, Cailliau K, Morel M, Hahnel S, Leutner S, Beckmann S, Grevelding CG, Dissous C: **Venus kinase receptors control reproduction in the platyhelminth parasite *Schistosoma mansoni***. *PLoS Pathog* 2014, **10**:e1004138.
11. Rinaldi G, Eckert SE, Tsai IJ, Suttiprapa S, Kines KJ, Tort JF, Mann VH, Turner DJ, Berriman M, Brindley PJ: **Germline transgenesis and insertional mutagenesis in *Schistosoma mansoni* mediated by murine leukemia virus**. *PLoS Pathog* 2012, **8**:e1002820.
12. Protasio AV, Tsai IJ, Babbage A, Nichol S, Hunt M, Aslett MA, De Silva N, Velarde GS, Anderson TJ, Clark RC, et al: **A systematically improved high quality genome and**

- transcriptome of the human blood fluke *Schistosoma mansoni*. *PLoS Negl Trop Dis* 2012, **6**:e1455.
13. Valentim CL, Cioli D, Chevalier FD, Cao X, Taylor AB, Holloway SP, Pica-Mattoccia L, Guidi A, Basso A, Tsai IJ, et al: **Genetic and molecular basis of drug resistance and species-specific drug action in schistosome parasites**. *Science* 2013, **342**:1385-1389.
14. Wang B, Collins JJ, 3rd, Newmark PA: **Functional genomic characterization of neoblast-like stem cells in larval *Schistosoma mansoni***. *Elife* 2013, **2**:e00768.
15. Collins JJ, 3rd, Wang B, Lambrus BG, Tharp ME, Iyer H, Newmark PA: **Adult somatic stem cells in the human parasite *Schistosoma mansoni***. *Nature* 2013, **494**:476-479.
16. Hagen J, Young ND, Every AL, Pagel CN, Schnoeller C, Scheerlinck JP, Gasser RB, Kalinna BH: **Omega-1 knockdown in *Schistosoma mansoni* eggs by lentivirus transduction reduces granuloma size in vivo**. *Nat Commun* 2014, **5**:5375.
17. Hoffmann KF, Brindley PJ, Berriman M: **Medicine. Halting harmful helminths**. *Science* 2014, **346**:168-169.
18. Pearce EJ, MacDonald AS: **The immunobiology of schistosomiasis**. *Nat Rev Immunol* 2002, **2**:499-511.
19. Steinfelder S, Andersen JF, Cannons JL, Feng CG, Joshi M, Dwyer D, Caspar P, Schwartzberg PL, Sher A, Jankovic D: **The major component in schistosome eggs responsible for conditioning dendritic cells for Th2 polarization is a T2 ribonuclease (omega-1)**. *J Exp Med* 2009, **206**:1681-1690.
20. Everts B, Perona-Wright G, Smits HH, Hokke CH, van der Ham AJ, Fitzsimmons CM, Doenhoff MJ, van der Bosch J, Mohrs K, Haas H, et al: **Omega-1, a glycoprotein secreted by *Schistosoma mansoni* eggs, drives Th2 responses**. *J Exp Med* 2009, **206**:1673-1680.
21. Pearce EJ, C MK, Sun J, J JT, McKee AS, Cervi L: **Th2 response polarization during infection with the helminth parasite *Schistosoma mansoni***. *Immunol Rev* 2004, **201**:117-126.
22. Everts B, Hussaarts L, Driessen NN, Meevissen MH, Schramm G, van der Ham AJ, van der Hoeven B, Scholzen T, Burgdorf S, Mohrs M, et al: **Schistosome-derived omega-1 drives Th2 polarization by suppressing protein synthesis following internalization by the mannose receptor**. *J Exp Med* 2012, **209**:1753-1767, S1751.
23. Dunne DW, Jones FM, Doenhoff MJ: **The purification, characterization, serological activity and hepatotoxic properties of two cationic glycoproteins (alpha 1 and omega 1) from *Schistosoma mansoni* eggs**. *Parasitology* 1991, **103 Pt 2**:225-236.

- 841 24. Curwen RS, Ashton PD, Johnston DA, Wilson RA: **The Schistosoma mansoni soluble**  
842 **proteome: a comparison across four life-cycle stages.** *Mol Biochem Parasitol* 2004,  
843 **138:57-66.**
- 844 25. Ashton PD, Harrop R, Shah B, Wilson RA: **The schistosome egg: development and**  
845 **secretions.** *Parasitology* 2001, **122:329-338.**
- 846 26. Cass CL, Johnson JR, Califf LL, Xu T, Hernandez HJ, Stadecker MJ, Yates JR, 3rd,  
847 Williams DL: **Proteomic analysis of Schistosoma mansoni egg secretions.** *Mol*  
848 *Biochem Parasitol* 2007, **155:84-93.**
- 849 27. Mathieson W, Wilson RA: **A comparative proteomic study of the undeveloped and**  
850 **developed Schistosoma mansoni egg and its contents: the miracidium, hatch fluid**  
851 **and secretions.** *Int J Parasitol* 2010, **40:617-628.**
- 852 28. Wilbers RH, Westerhof LB, van Noort K, Obieglo K, Driessen NN, Everts B, Gringhuis  
853 SI, Schramm G, Goverse A, Smant G, et al: **Production and glyco-engineering of**  
854 **immunomodulatory helminth glycoproteins in plants.** *Sci Rep* 2017, **7:45910.**
- 855 29. Fitzsimmons CM, Schramm G, Jones FM, Chalmers IW, Hoffmann KF, Grevelding CG,  
856 Wuhler M, Hokke CH, Haas H, Doenhoff MJ, Dunne DW: **Molecular characterization**  
857 **of omega-1: a hepatotoxic ribonuclease from Schistosoma mansoni eggs.** *Mol*  
858 *Biochem Parasitol* 2005, **144:123-127.**
- 859 30. Ferguson BJ, Newland SA, Gibbs SE, Tourlomousis P, Fernandes dos Santos P, Patel  
860 MN, Hall SW, Walczak H, Schramm G, Haas H, et al: **The Schistosoma mansoni T2**  
861 **ribonuclease omega-1 modulates inflammasome-dependent IL-1beta secretion in**  
862 **macrophages.** *Int J Parasitol* 2015, **45:809-813.**
- 863 31. Wynn TA, Thompson RW, Cheever AW, Mentink-Kane MM: **Immunopathogenesis of**  
864 **schistosomiasis.** *Immunol Rev* 2004, **201:156-167.**
- 865 32. Jinek M, Chylinski K, Fonfara I, Hauer M, Doudna JA, Charpentier E: **A programmable**  
866 **dual-RNA-guided DNA endonuclease in adaptive bacterial immunity.** *Science* 2012,  
867 **337:816-821.**
- 868 33. Hsu PD, Lander ES, Zhang F: **Development and applications of CRISPR-Cas9 for**  
869 **genome engineering.** *Cell* 2014, **157:1262-1278.**
- 870 34. Murare HM, Dunne DW, Bain J, Doenhoff MJ: **Schistosoma mansoni: control of**  
871 **hepatotoxicity and egg excretion by immune serum in infected immunosuppressed**  
872 **mice is schistosome species-specific, but not S. mansoni strain-specific.** *Exp Parasitol*  
873 **1992, 75:329-339.**
- 874 35. M LZZYB: **A web portal for gene expression across all life stages of Schistosoma**  
875 **mansoni.** *bioRxiv* 2018.



- 876 36. Lee AH, Symington LS, Fidock DA: **DNA repair mechanisms and their biological**  
877 **roles in the malaria parasite Plasmodium falciparum.** *Microbiol Mol Biol Rev* 2014,  
878 **78**:469-486.
- 879 37. Deriano L, Roth DB: **Modernizing the nonhomologous end-joining repertoire:**  
880 **alternative and classical NHEJ share the stage.** *Annu Rev Genet* 2013, **47**:433-455.
- 881 38. Consortium IHG: **Comparative genomics of the major parasitic worms.** *bioRxiv* 2017,  
882 **<https://http://www.biorxiv.org/content/early/2017/12/20/236539>**
- 883 39. Lok JB, Shao H, Massey HC, Li X: **Transgenesis in Strongyloides and related**  
884 **parasitic nematodes: historical perspectives, current functional genomic**  
885 **applications and progress towards gene disruption and editing.** *Parasitology* 2017,  
886 **144**:327-342.
- 887 40. Gang SS, Castelletto ML, Bryant AS, Yang E, Mancuso N, Lopez JB, Pellegrini M,  
888 Hallem EA: **Targeted mutagenesis in a human-parasitic nematode.** *PLoS Pathog*  
889 2017, **13**:e1006675.
- 890 41. Chen F, Pruett-Miller SM, Davis GD: **Gene editing using ssODNs with engineered**  
891 **endonucleases.** *Methods Mol Biol* 2015, **1239**:251-265.
- 892 42. Duvoisin R, Ayuk MA, Rinaldi G, Suttiprapa S, Mann VH, Lee CM, Harris N, Brindley  
893 PJ: **Human U6 promoter drives stronger shRNA activity than its schistosome**  
894 **orthologue in Schistosoma mansoni and human fibrosarcoma cells.** *Transgenic Res*  
895 2012, **21**:511-521.
- 896 43. Suttiprapa S, Rinaldi G, Tsai IJ, Mann VH, Dubrovsky L, Yan HB, Holroyd N, Huckvale  
897 T, Durrant C, Protasio AV, et al: **HIV-1 Integrates Widely throughout the Genome of**  
898 **the Human Blood Fluke Schistosoma mansoni.** *PLoS Pathog* 2016, **12**:e1005931.
- 899 44. Shah AN, Davey CF, Whitebitch AC, Miller AC, Moens CB: **Rapid reverse genetic**  
900 **screening using CRISPR in zebrafish.** *Nat Methods* 2015, **12**:535-540.
- 901 45. Yu C, Zhang Y, Yao S, Wei Y: **A PCR based protocol for detecting indel mutations**  
902 **induced by TALENs and CRISPR/Cas9 in zebrafish.** *PLoS One* 2014, **9**:e98282.
- 903 46. Pinello L, Canver MC, Hoban MD, Orkin SH, Kohn DB, Bauer DE, Yuan GC:  
904 **Analyzing CRISPR genome-editing experiments with CRISPResso.** *Nat Biotechnol*  
905 2016, **34**:695-697.
- 906 47. Suttiprapa S, Rinaldi G, Brindley PJ: **Prototypic chromatin insulator cHS4 protects**  
907 **retroviral transgene from silencing in Schistosoma mansoni.** *Transgenic Res* 2012,  
908 **21**:555-566.

- 909 48. Ke XD, Shen S, Song LJ, Yu CX, Kikuchi M, Hirayama K, Gao H, Wang J, Yin X, Yao  
910 Y, et al: **Characterization of Schistosoma japonicum CP1412 protein as a novel**  
911 **member of the ribonuclease T2 molecule family with immune regulatory function.**  
912 *Parasit Vectors* 2017, **10**:89.
- 913 49. Zaccane P, Burton OT, Gibbs SE, Miller N, Jones FM, Schramm G, Haas H, Doenhoff  
914 MJ, Dunne DW, Cooke A: **The S. mansoni glycoprotein omega-1 induces Foxp3**  
915 **expression in NOD mouse CD4(+) T cells.** *Eur J Immunol* 2011, **41**:2709-2718.
- 916 50. Ritter M, Gross O, Kays S, Ruland J, Nimmerjahn F, Saijo S, Tschopp J, Layland LE,  
917 Prazeres da Costa C: **Schistosoma mansoni triggers Dectin-2, which activates the**  
918 **Nlrp3 inflammasome and alters adaptive immune responses.** *Proc Natl Acad Sci U S*  
919 *A* 2010, **107**:20459-20464.
- 920 51. Qin Z: **The use of THP-1 cells as a model for mimicking the function and regulation**  
921 **of monocytes and macrophages in the vasculature.** *Atherosclerosis* 2012, **221**:2-11.
- 922 52. Fuentes L, Hernandez M, Fernandez-Aviles FJ, Crespo MS, Nieto ML: **Cooperation**  
923 **between secretory phospholipase A2 and TNF-receptor superfamily signaling:**  
924 **implications for the inflammatory response in atherogenesis.** *Circ Res* 2002, **91**:681-  
925 688.
- 926 53. Doenhoff MJ, Hassounah O, Murare H, Bain J, Lucas S: **The schistosome egg**  
927 **granuloma: immunopathology in the cause of host protection or parasite survival?**  
928 *Trans R Soc Trop Med Hyg* 1986, **80**:503-514.
- 929 54. Boros DL, Warren KS: **Delayed hypersensitivity-type granuloma formation and**  
930 **dermal reaction induced and elicited by a soluble factor isolated from Schistosoma**  
931 **mansoni eggs.** *J Exp Med* 1970, **132**:488-507.
- 932 55. Eltoun IA, Wynn TA, Poindexter RW, Finkelman FD, Lewis FA, Sher A, Cheever AW:  
933 **Suppressive effect of interleukin-4 neutralization differs for granulomas around**  
934 **Schistosoma mansoni eggs injected into mice compared with those around eggs laid**  
935 **in infected mice.** *Infect Immun* 1995, **63**:2532-2536.
- 936 56. Wynn TA, Eltoun I, Cheever AW, Lewis FA, Gause WC, Sher A: **Analysis of cytokine**  
937 **mRNA expression during primary granuloma formation induced by eggs of**  
938 **Schistosoma mansoni.** *J Immunol* 1993, **151**:1430-1440.
- 939 57. Lieber MR: **The mechanism of double-strand DNA break repair by the**  
940 **nonhomologous DNA end-joining pathway.** *Annu Rev Biochem* 2010, **79**:181-211.
- 941 58. Paquet D, Kwart D, Chen A, Sproul A, Jacob S, Teo S, Olsen KM, Gregg A, Noggle S,  
942 Tessier-Lavigne M: **Efficient introduction of specific homozygous and heterozygous**  
943 **mutations using CRISPR/Cas9.** *Nature* 2016, **533**:125-129.

- 944 59. Zhang WW, Matlashewski G: **CRISPR-Cas9-Mediated Genome Editing in**  
945 **Leishmania donovani**. *MBio* 2015, **6**:e00861.
- 946 60. Yoshimi K, Kunihiro Y, Kaneko T, Nagahora H, Voigt B, Mashimo T: **ssODN-mediated**  
947 **knock-in with CRISPR-Cas for large genomic regions in zygotes**. *Nature*  
948 *communications* 2016, **7**:10431.
- 949 61. Kosicki M, Rajan SS, Lorenzetti FC, Wandall HH, Narimatsu Y, Metzakopian E, Bennett  
950 EP: **Dynamics of Indel Profiles Induced by Various CRISPR/Cas9 Delivery**  
951 **Methods**. *Prog Mol Biol Transl Sci* 2017, **152**:49-67.
- 952 62. Holmgaard A, Askou AL, Benckendorff JNE, Thomsen EA, Cai Y, Bek T, Mikkelsen  
953 JG, Corydon TJ: **In Vivo Knockout of the Vegfa Gene by Lentiviral Delivery of**  
954 **CRISPR/Cas9 in Mouse Retinal Pigment Epithelium Cells**. *Mol Ther Nucleic Acids*  
955 2017, **9**:89-99.
- 956 63. Yu Z, Chen Q, Chen W, Zhang X, Mei F, Zhang P, Zhao M, Wang X, Shi N, Jackson S,  
957 Hong Y: **Multigene editing via CRISPR/Cas9 guided by a single-sgRNA seed in**  
958 **Arabidopsis**. *J Integr Plant Biol* 2018, **60**:376-381.
- 959 64. Luo JJ, Bian WP, Liu Y, Huang HY, Yin Q, Yang XJ, Pei DS: **CRISPR/Cas9-based**  
960 **genome engineering of zebrafish using a seamless integration strategy**. *FASEB J*  
961 2018:fj201800077RR.
- 962 65. Shalem O, Sanjana NE, Zhang F: **High-throughput functional genomics using**  
963 **CRISPR-Cas9**. *Nat Rev Genet* 2015, **16**:299-311.
- 964 66. Jurberg AD, Goncalves T, Costa TA, de Mattos AC, Pascarelli BM, de Manso PP,  
965 Ribeiro-Alves M, Pelajo-Machado M, Peralta JM, Coelho PM, Lenzi HL: **The**  
966 **embryonic development of Schistosoma mansoni eggs: proposal for a new staging**  
967 **system**. *Dev Genes Evol* 2009, **219**:219-234.
- 968 67. Neill PJ, Smith JH, Doughty BL, Kemp M: **The ultrastructure of the Schistosoma**  
969 **mansoni egg**. *Am J Trop Med Hyg* 1988, **39**:52-65.
- 970 68. Mann VH, Suttiprapa S, Rinaldi G, Brindley PJ: **Establishing transgenic schistosomes**.  
971 *PLoS Negl Trop Dis* 2011, **5**:e1230.
- 972 69. Heyer WD, Ehmsen KT, Liu J: **Regulation of homologous recombination in**  
973 **eukaryotes**. *Annu Rev Genet* 2010, **44**:113-139.
- 974 70. Lu Z, ; Zhang, Y.; Berriman, M.: **A web portal for gene expression across all life**  
975 **stages of Schistosoma mansoni**. *bioRxiv* 2018.
- 976 71. Schramm G, Hamilton JV, Balog CI, Wuhner M, Gronow A, Beckmann S, Wippersteg V,  
977 Grevelding CG, Goldmann T, Weber E, et al: **Molecular characterisation of kappa-5, a**

978        **major antigenic glycoprotein from *Schistosoma mansoni* eggs.** *Mol Biochem Parasitol*  
979        2009, **166**:4-14.

980        72.        Kaisar MMM, Ritter M, Del Fresno C, Jonasdottir HS, van der Ham AJ, Pelgrom LR,  
981        Schramm G, Layland LE, Sancho D, Prazeres da Costa C, et al: **Dectin-1/2-induced**  
982        **autocrine PGE2 signaling licenses dendritic cells to prime Th2 responses.** *PLoS Biol*  
983        2018, **16**:e2005504.

984        73.        Mann VH, Suttiprapa S, Skinner DE, Brindley PJ, Rinaldi G: **Pseudotyped murine**  
985        **leukemia virus for schistosome transgenesis: approaches, methods and perspectives.**  
986        *Transgenic Res* 2014, **23**:539-556.

987        74.        Dalton JP, Day SR, Drew AC, Brindley PJ: **A method for the isolation of schistosome**  
988        **eggs and miracidia free of contaminating host tissues.** *Parasitology* 1997, **115** ( Pt  
989        1):29-32.

990        75.        Mann VH, Morales ME, Rinaldi G, Brindley PJ: **Culture for genetic manipulation of**  
991        **developmental stages of *Schistosoma mansoni*.** *Parasitology* 2010, **137**:451-462.

992        76.        Cardoso LS, Araujo MI, Goes AM, Pacifico LG, Oliveira RR, Oliveira SC: **Polymyxin B**  
993        **as inhibitor of LPS contamination of *Schistosoma mansoni* recombinant proteins in**  
994        **human cytokine analysis.** *Microb Cell Fact* 2007, **6**:1.

995        77.        Bradford MM: **A rapid and sensitive method for the quantitation of microgram**  
996        **quantities of protein utilizing the principle of protein-dye binding.** *Anal Biochem*  
997        1976, **72**:248-254.

998        78.        Oliveros JC, Franch M, Tabas-Madrid D, San-Leon D, Montoliu L, Cubas P, Pazos F:  
999        **Breaking-Cas-interactive design of guide RNAs for CRISPR-Cas experiments for**  
1000        **ENSEMBL genomes.** *Nucleic Acids Res* 2016, **44**:W267-271.

1001        79.        Minskaia E, Nicholson J, Ryan MD: **Optimisation of the foot-and-mouth disease virus**  
1002        **2A co-expression system for biomedical applications.** *BMC Biotechnol* 2013, **13**:67.

1003        80.        Lok JB, Shao H, Massey HC, Li X: **Transgenesis in *Strongyloides* and related**  
1004        **parasitic nematodes: historical perspectives, current functional genomic**  
1005        **applications and progress towards gene disruption and editing.** *Parasitology* 2016:1-  
1006        16.

1007        81.        Marozsan AJ, Fraundorf E, Abrahama A, Baird H, Moore D, Troyer R, Nankja I, Arts EJ:  
1008        **Relationships between infectious titer, capsid protein levels, and reverse**  
1009        **transcriptase activities of diverse human immunodeficiency virus type 1 isolates.** *J*  
1010        *Virol* 2004, **78**:11130-11141.

82. Martin M: **Cutadapt removes adapter sequences from high-throughput sequencing reads.** *EMBnetjournal North America* 2011, <http://journal.embnet.org/index.php/embnetjournal/article/view/200/458>.
83. Canver MC, Haeussler M, Bauer DE, Orkin SH, Sanjana NE, Shalem O, Yuan GC, Zhang F, Concordet JP, Pinello L: **Integrated design, execution, and analysis of arrayed and pooled CRISPR genome-editing experiments.** *Nat Protoc* 2018, **13**:946-986.
84. Pearson WR, Lipman DJ: **Improved tools for biological sequence comparison.** *Proc Natl Acad Sci U S A* 1988, **85**:2444-2448.
85. Ginzinger DG: **Gene quantification using real-time quantitative PCR: an emerging technology hits the mainstream.** *Exp Hematol* 2002, **30**:503-512.
86. Livak KJ, Schmittgen TD: **Analysis of relative gene expression data using real-time quantitative PCR and the 2(-Delta Delta C(T)) Method.** *Methods* 2001, **25**:402-408.
87. Chomczynski P: **A reagent for the single-step simultaneous isolation of RNA, DNA and proteins from cell and tissue samples.** *Biotechniques* 1993, **15**:532-534, 536-537.
88. Genin M, Clement F, Fattaccioli A, Raes M, Michiels C: **M1 and M2 macrophages derived from THP-1 cells differentially modulate the response of cancer cells to etoposide.** *BMC Cancer* 2015, **15**:577.
89. Schmid MC, Varner JA: **Myeloid cells in the tumor microenvironment: modulation of tumor angiogenesis and tumor inflammation.** *J Oncol* 2010, **2010**:201026.
90. Cheever AW, Finkelman FD, Caspar P, Heiny S, Macedonia JG, Sher A: **Treatment with anti-IL-2 antibodies reduces hepatic pathology and eosinophilia in Schistosoma mansoni-infected mice while selectively inhibiting T cell IL-5 production.** *J Immunol* 1992, **148**:3244-3248.
91. Crooks GE, Hon G, Chandonia JM, Brenner SE: **WebLogo: a sequence logo generator.** *Genome Res* 2004, **14**:1188-1190.
92. Gieseck RL, 3rd, Wilson MS, Wynn TA: **Type 2 immunity in tissue repair and fibrosis.** *Nat Rev Immunol* 2018, **18**:62-76.
93. Wynn TA: **Type 2 cytokines: mechanisms and therapeutic strategies.** *Nat Rev Immunol* 2015, **15**:271-282.

### Figure 1

**A**

Smp\_193860

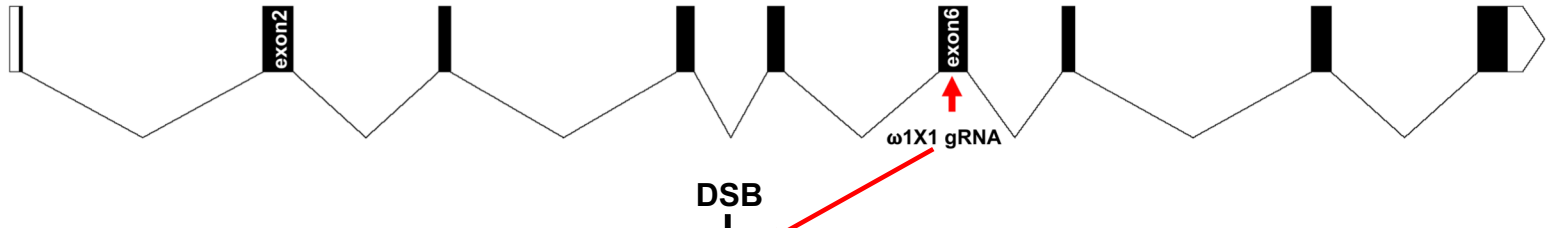

# B

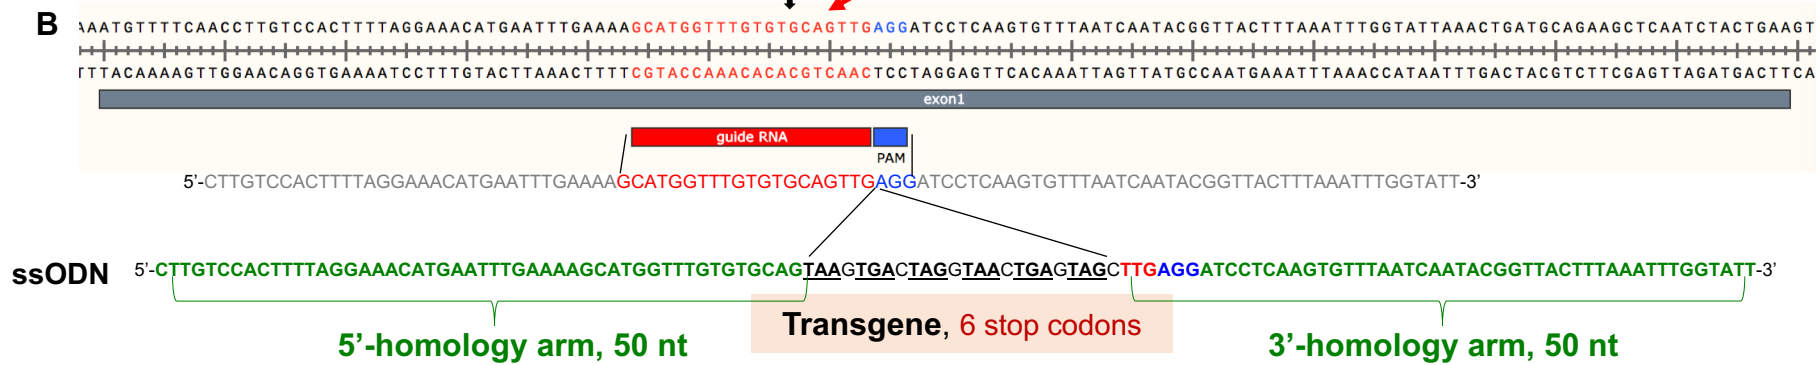

**C**

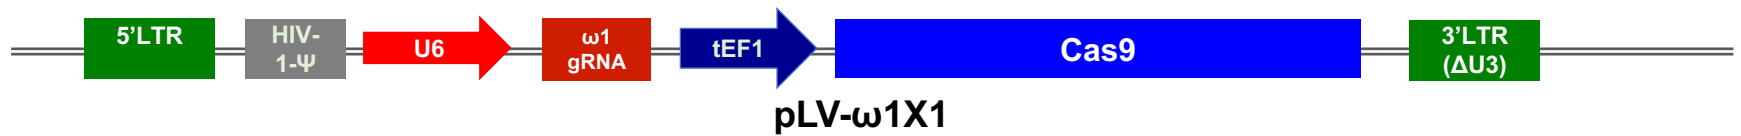





**Figure 3**

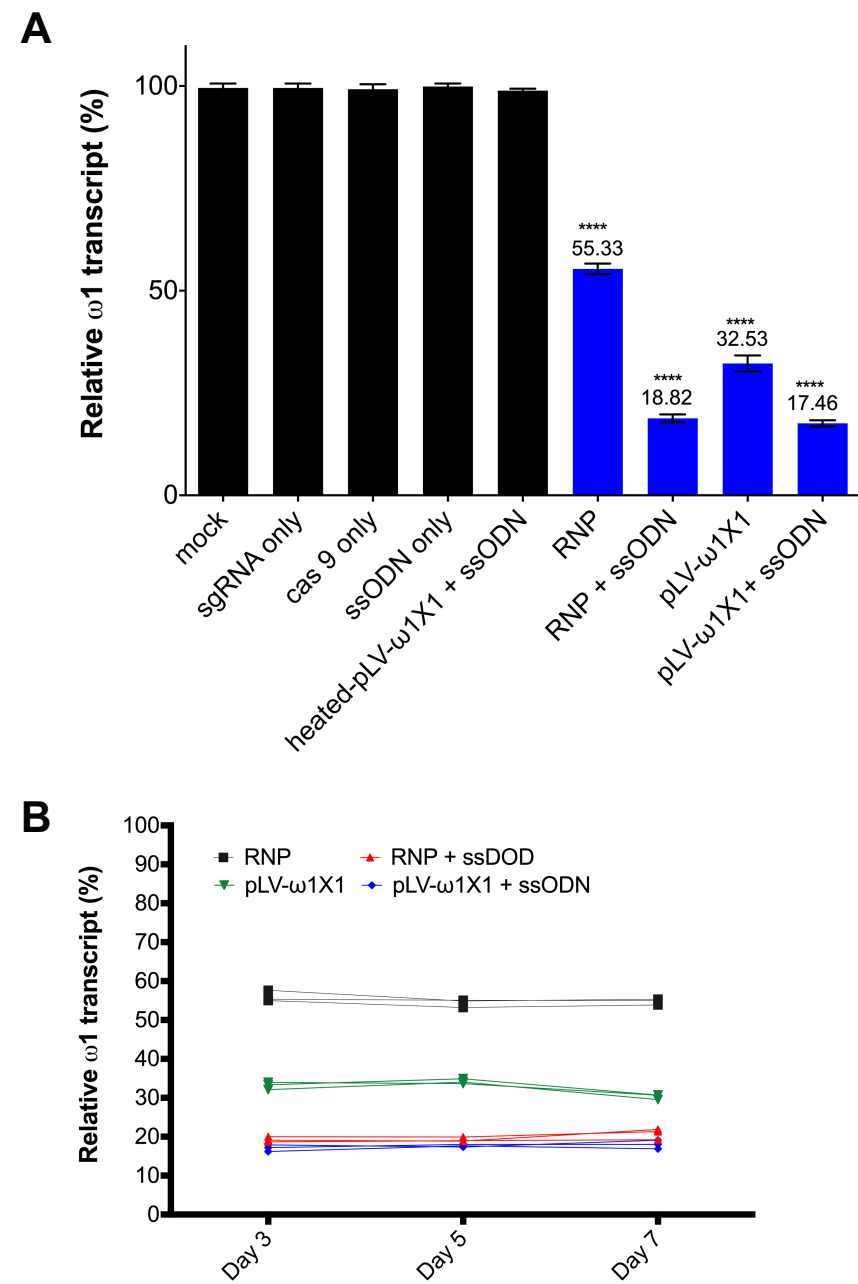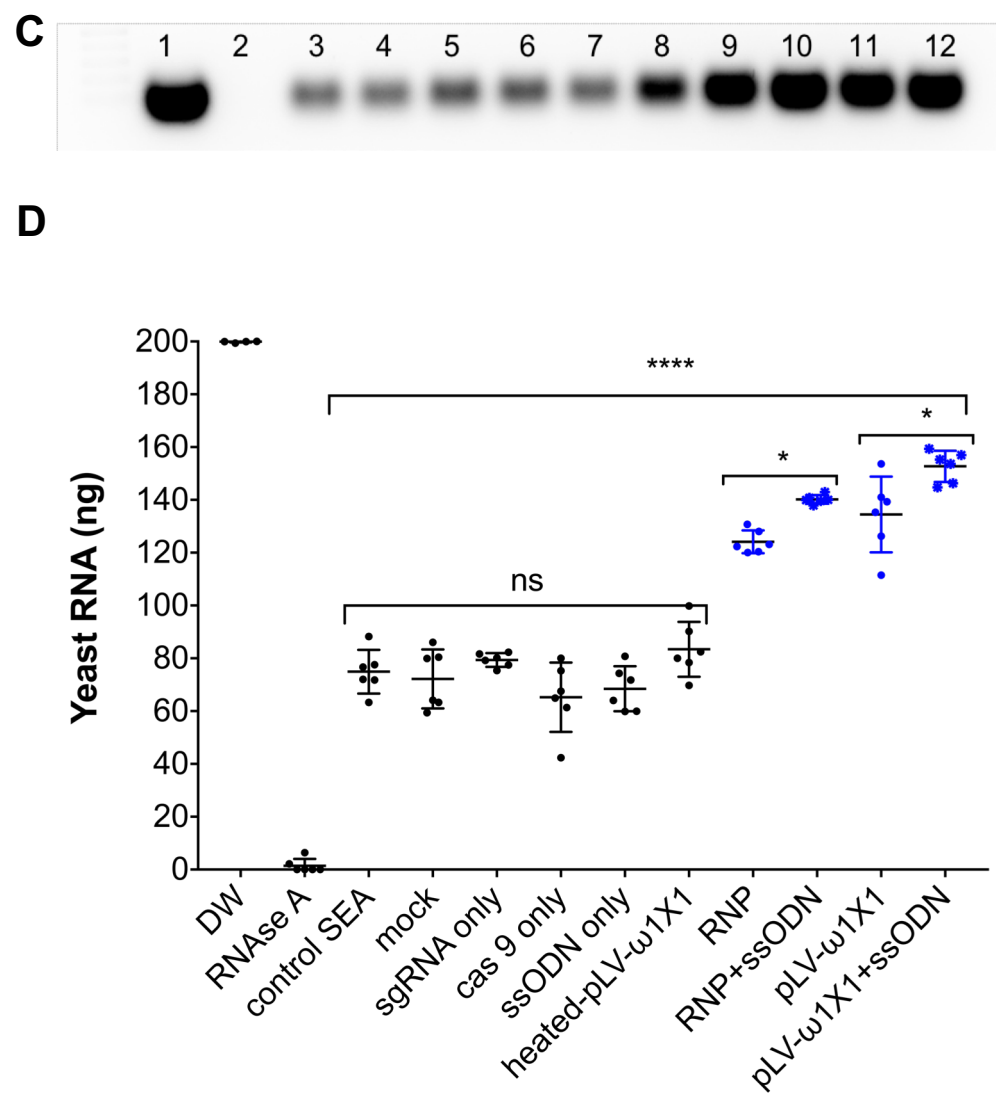

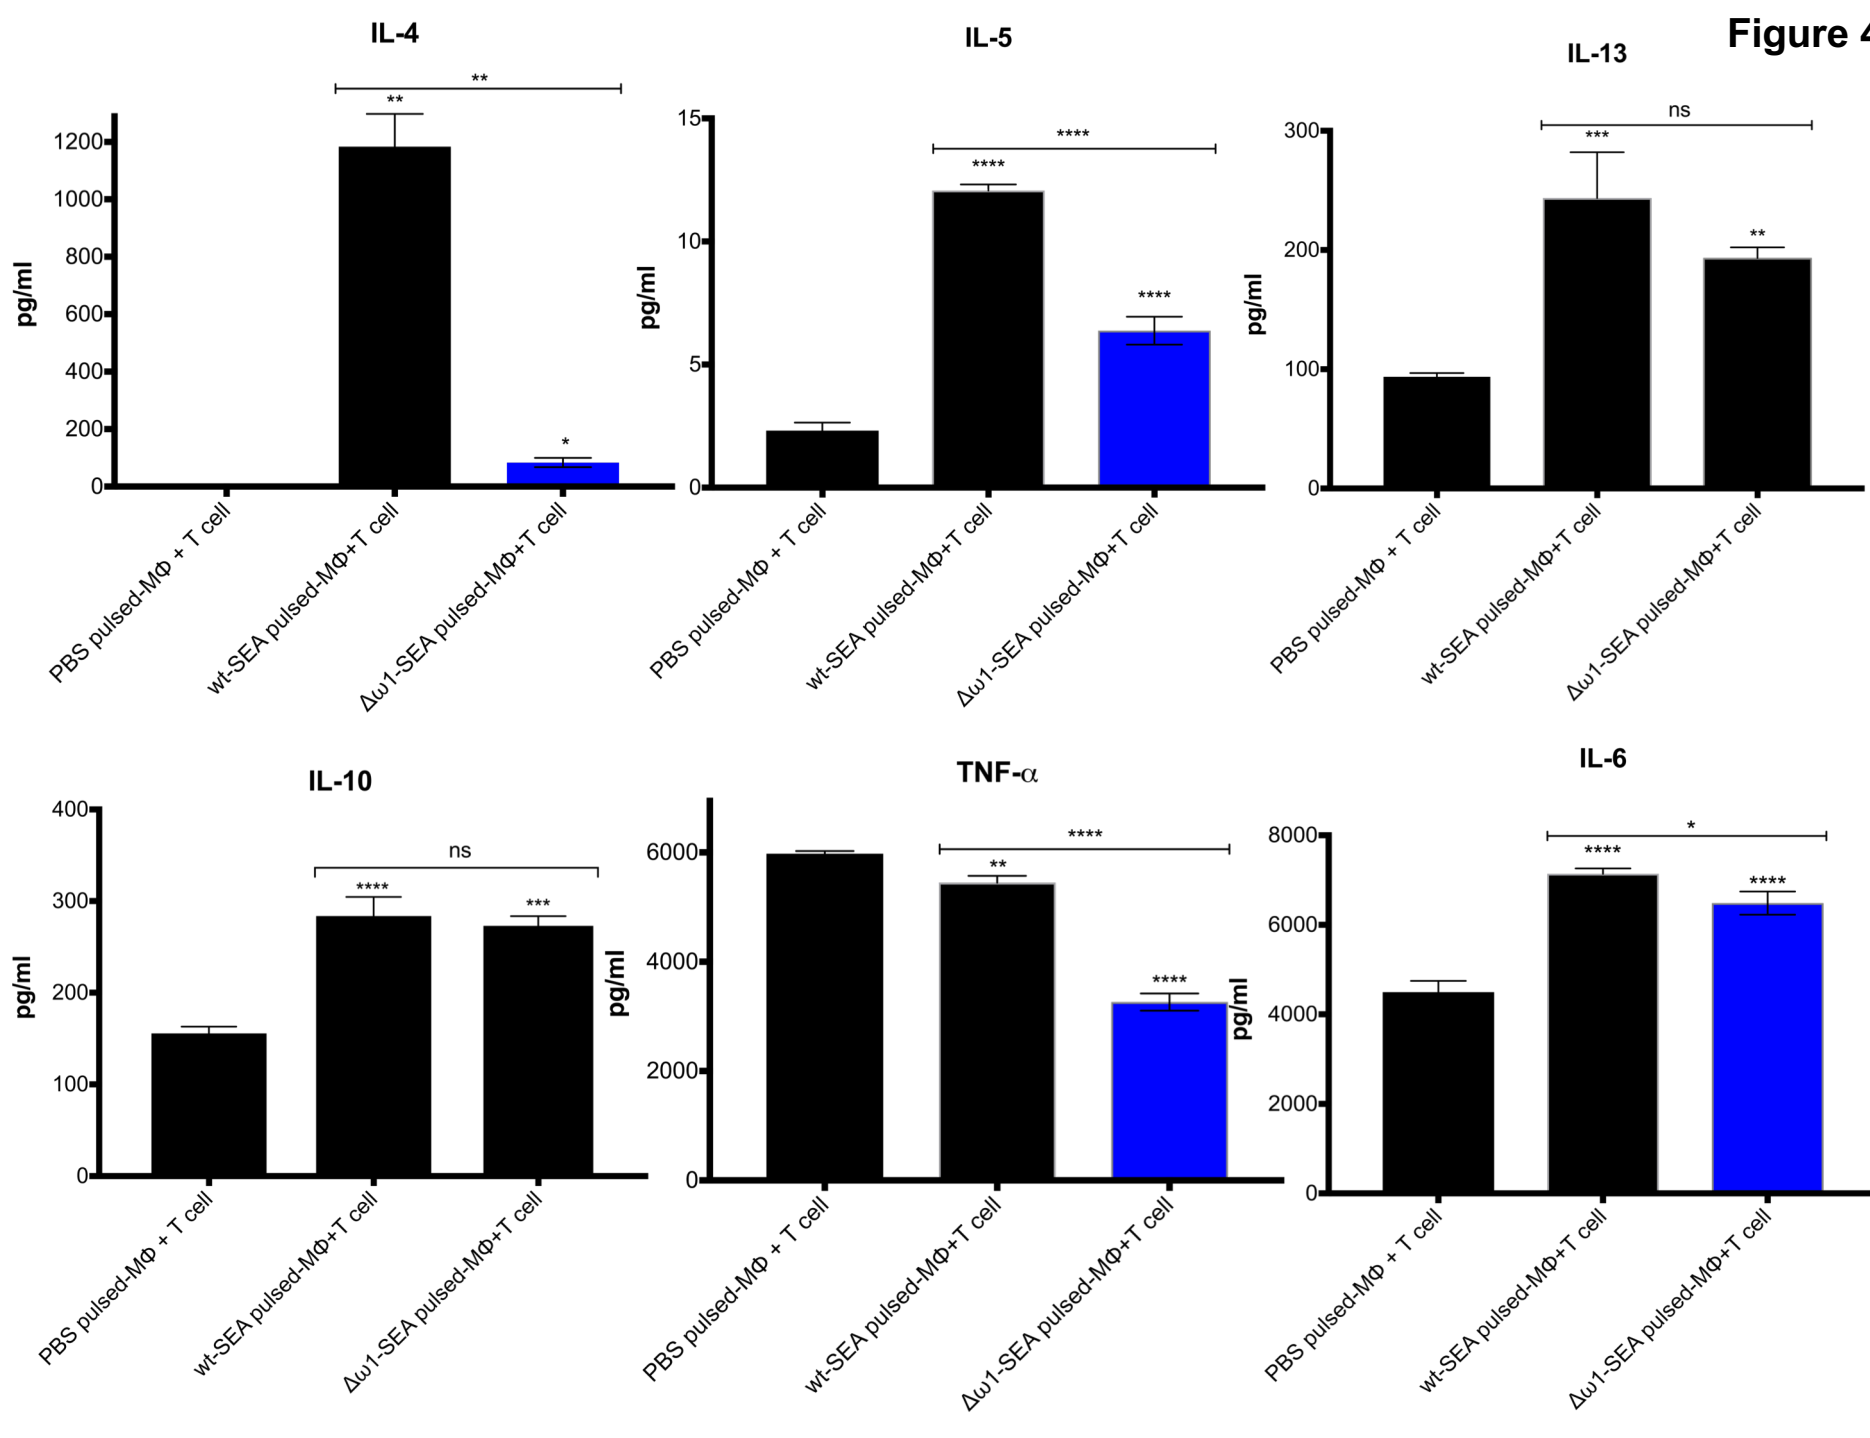



Figure 5

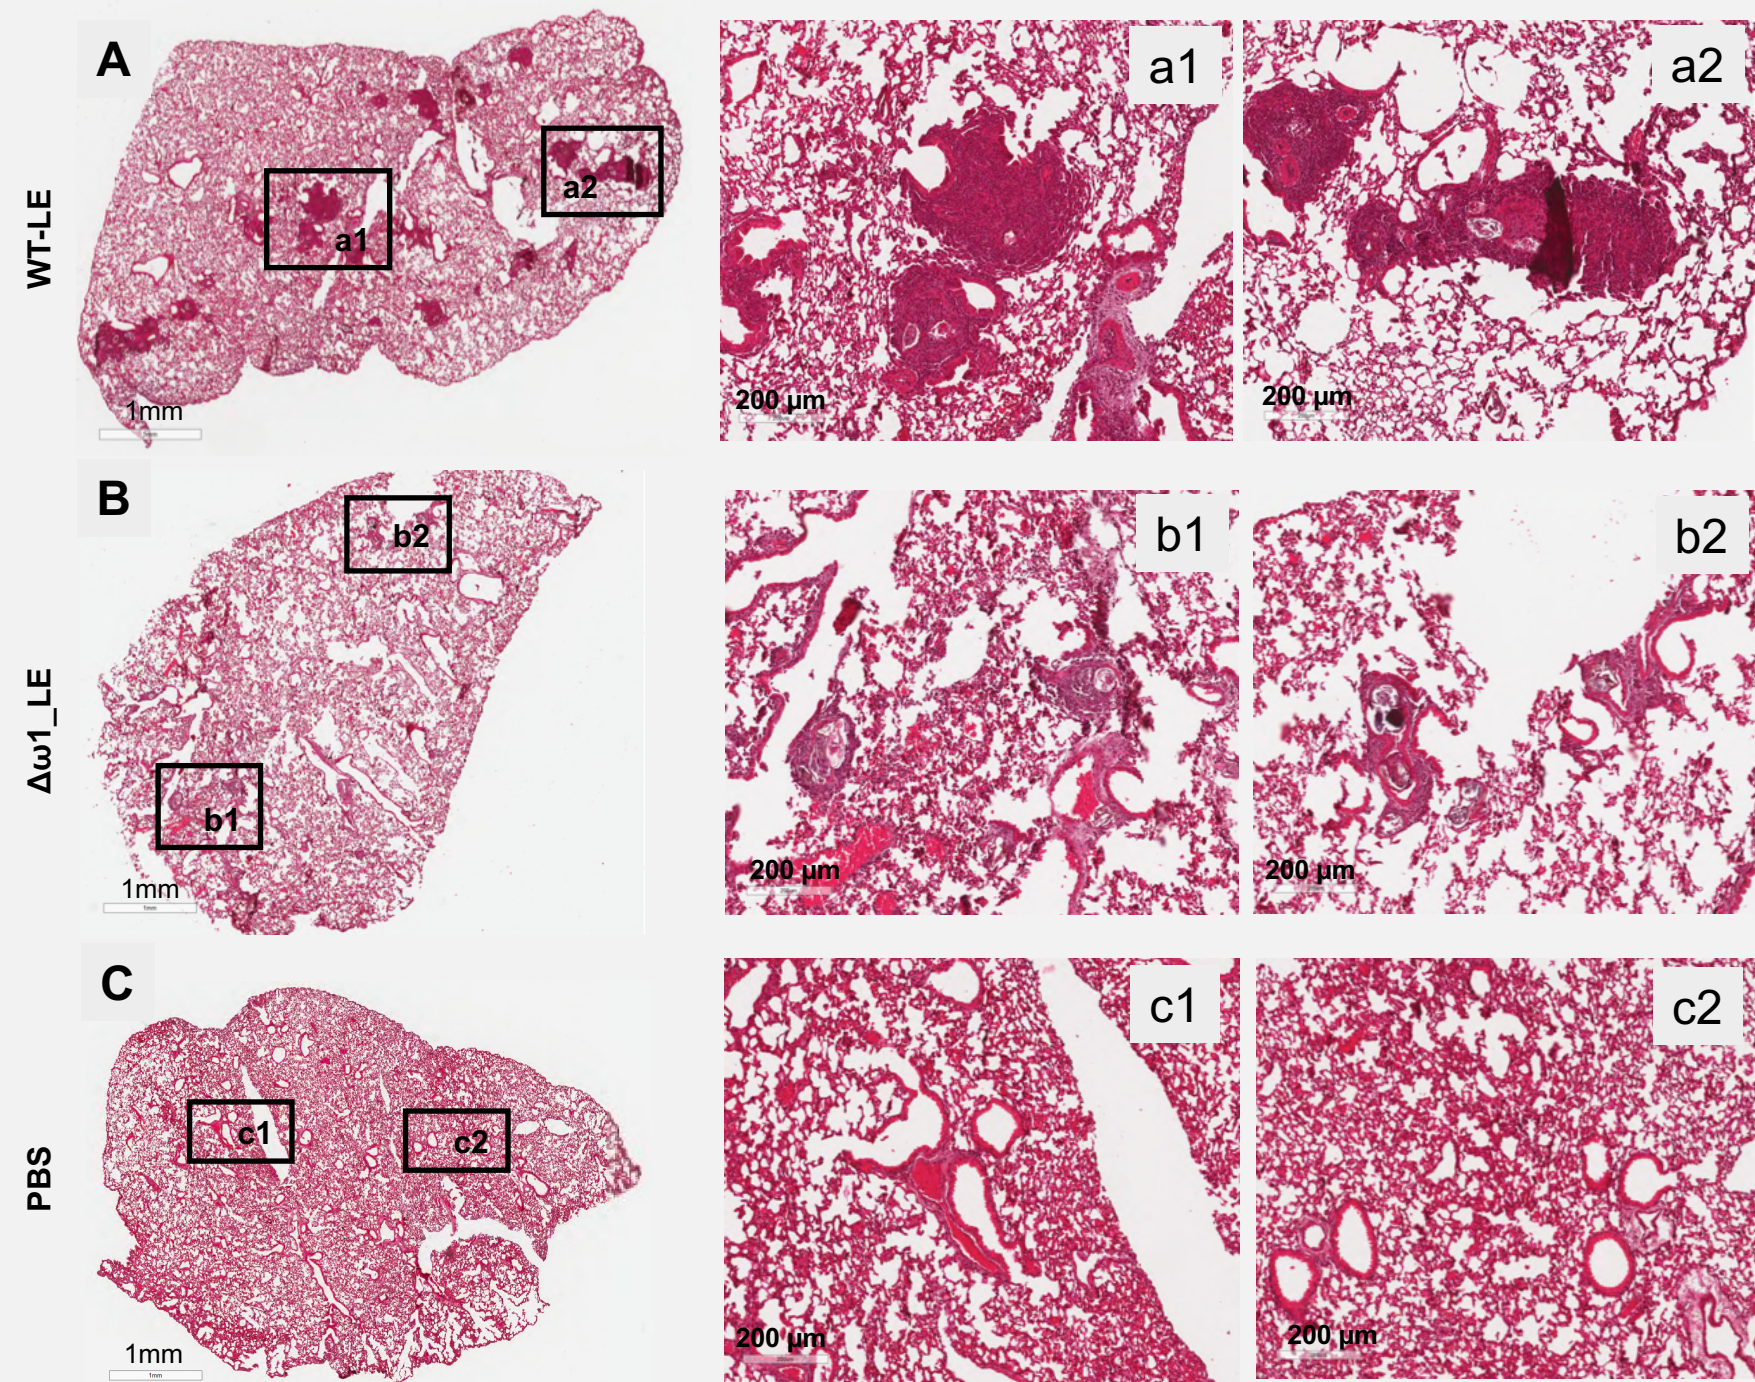



Figure 5 (cont.)

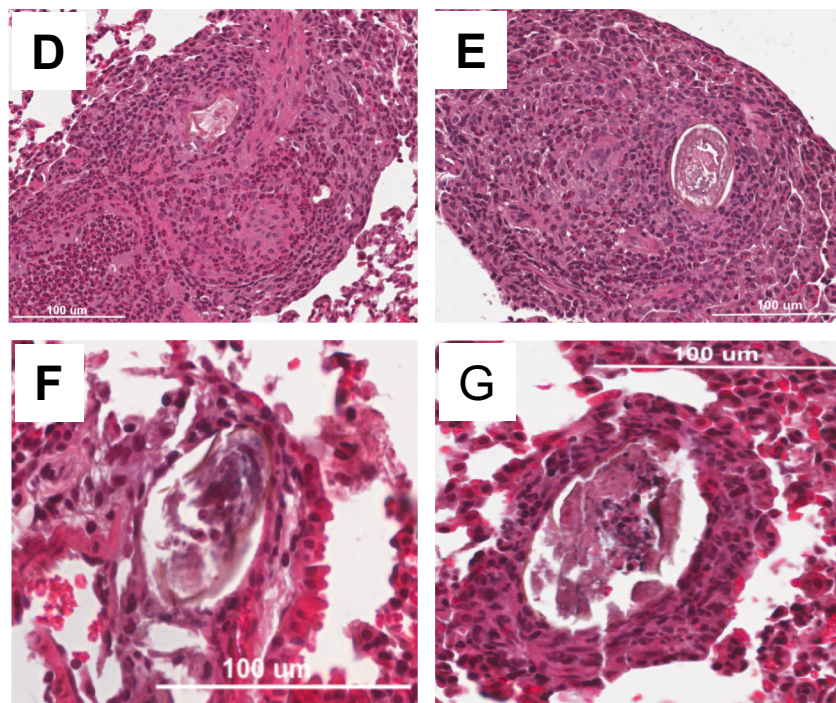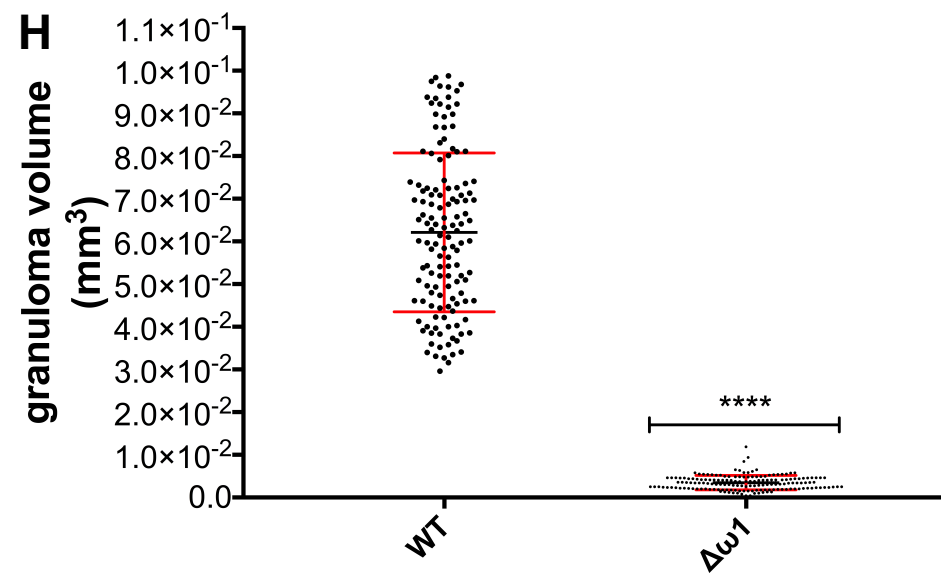

Source: http://biorxiv.org/content/10.1101/358424v3.full.pdf
